# Supplementary material for: Distinguishing Late Holocene Storm Deposit From Shore-normal Beach Sediments From the Gulf of Thailand
Source: Frontiers journal article supplement (doi:10.3389/feart.2021.625926), 2021-02-22
Supplement: Table_1.DOCX [file Table_1.DOCX]

**OSL Decay curve and Growth curve of each sample**
