# Supplementary material for: Distinguishing Late Holocene Storm Deposit From Shore-normal Beach Sediments From the Gulf of Thailand
Source: Frontiers journal article supplement (doi:10.3389/feart.2021.625926), 2021-02-22
Supplement: Table_2.DOCX [file Table_2.DOCX]

**Detailed information of OSL results**

K1-1


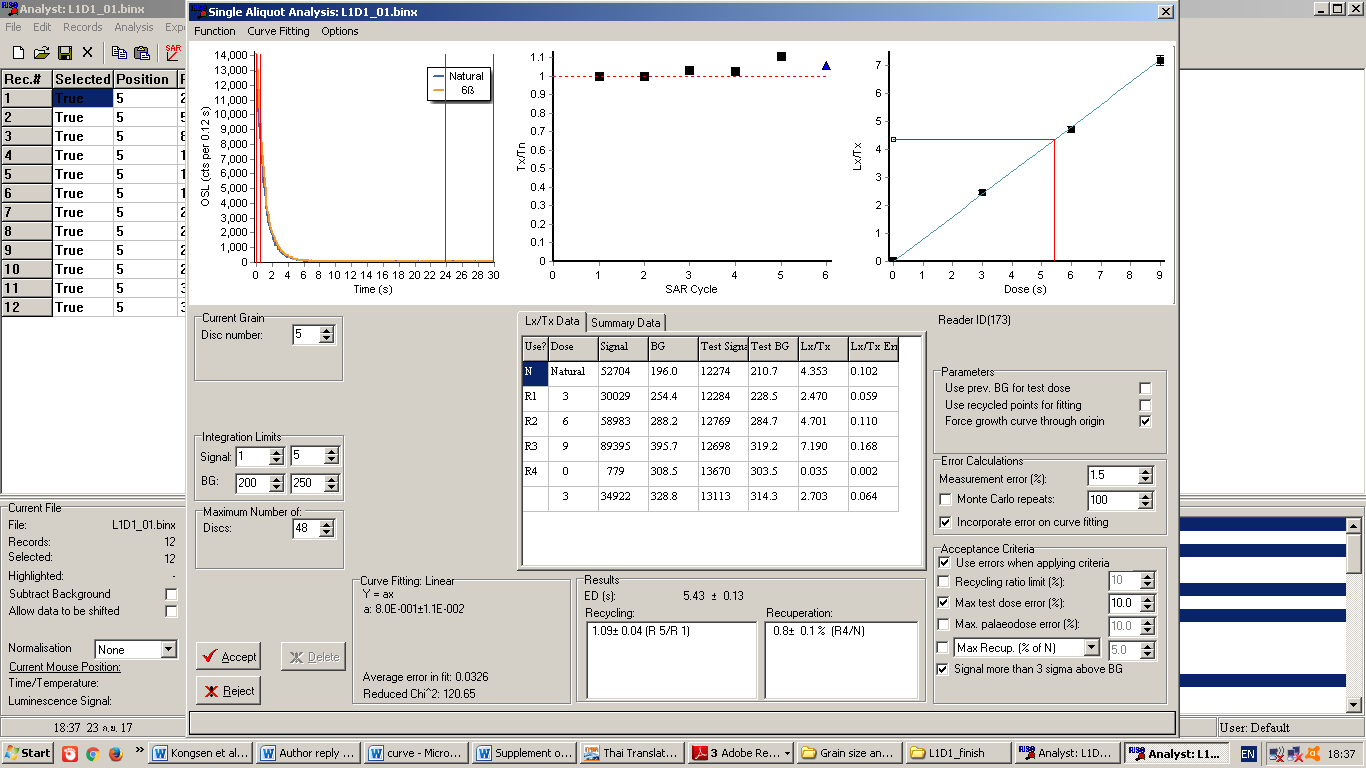


Recycling ratio = 1.09± 0.04 (R 5/R 1)

Recuperation = 0.8± 0.1 % (R4/N)

K1-2


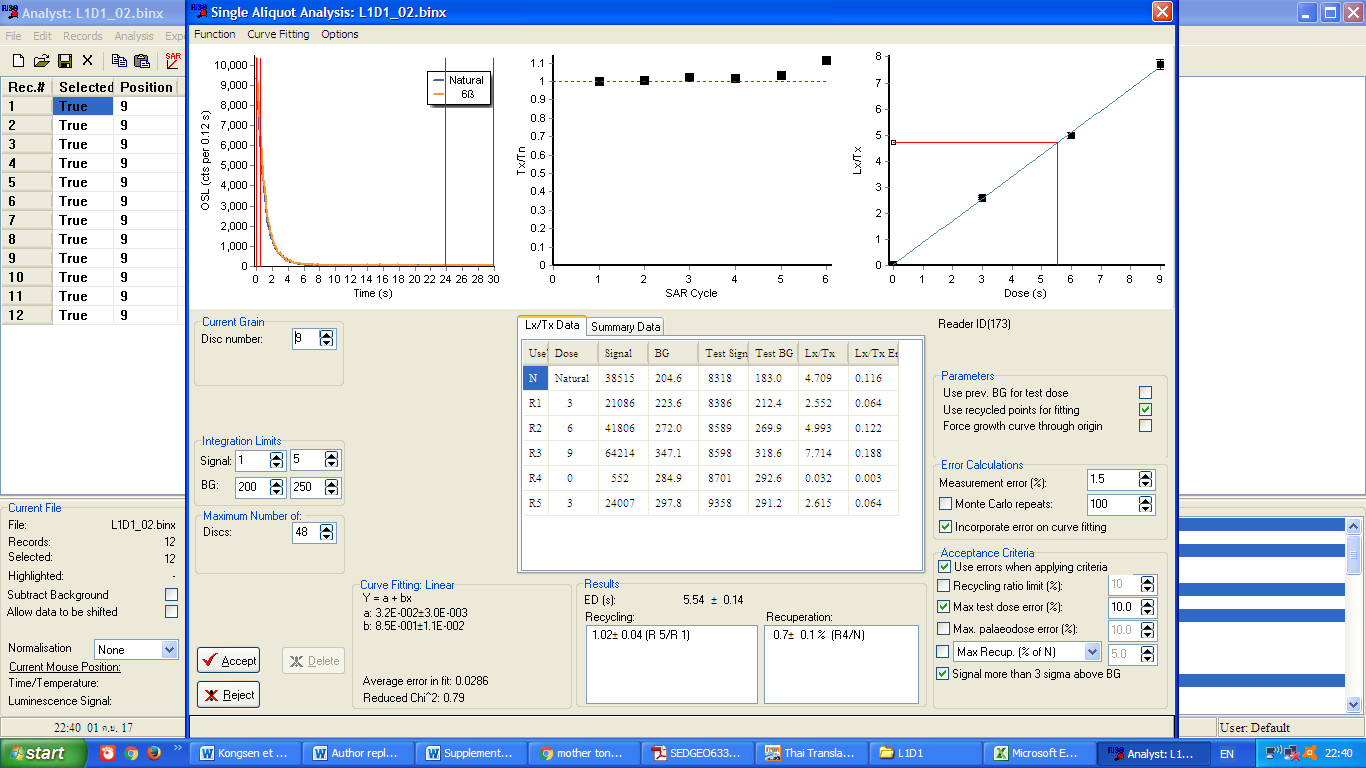
Recycling ratio = 1.02± 0.04 (R 5/R 1)

Recuperation = 0.7± 0.1 % (R4/N)

K1-3


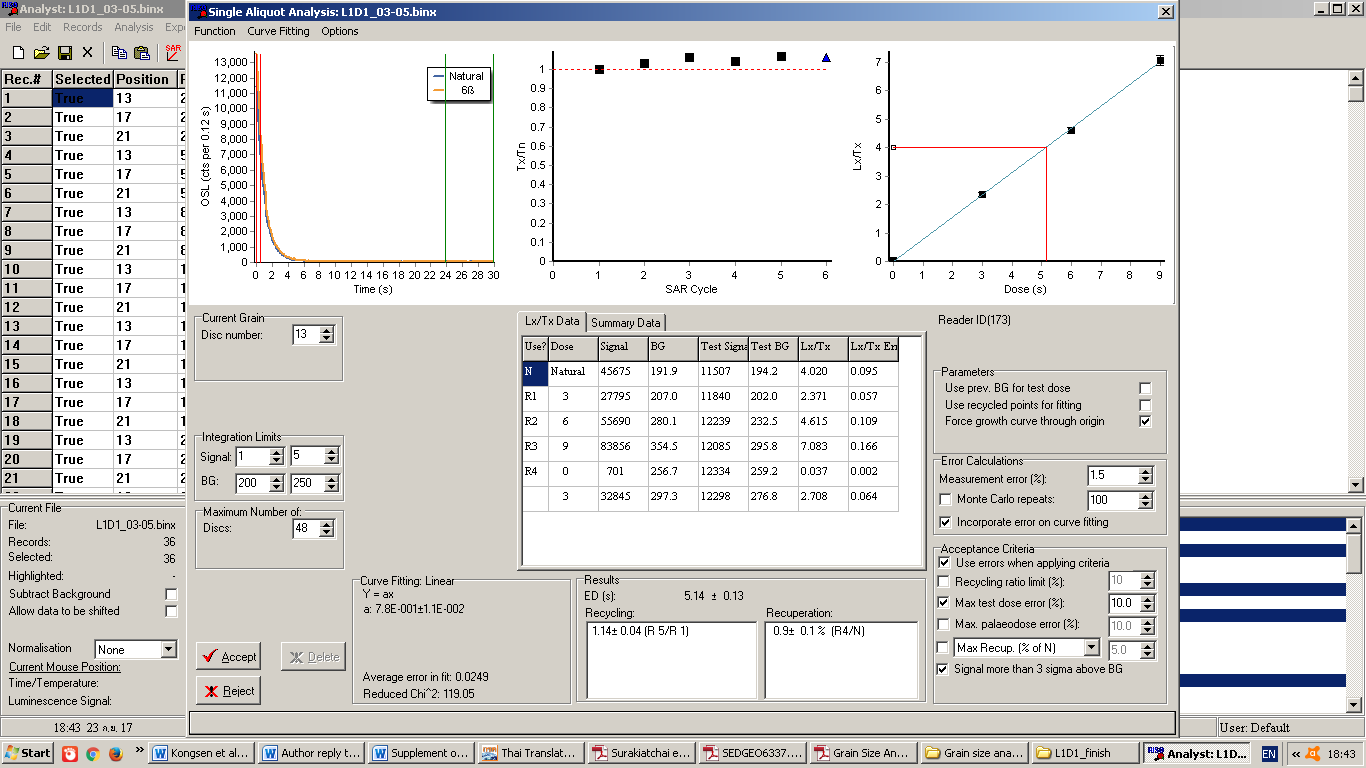


Recycling ratio = 1.14± 0.04 (R 5/R 1)

Recuperation = 0.9± 0.1 % (R4/N)

K1-4


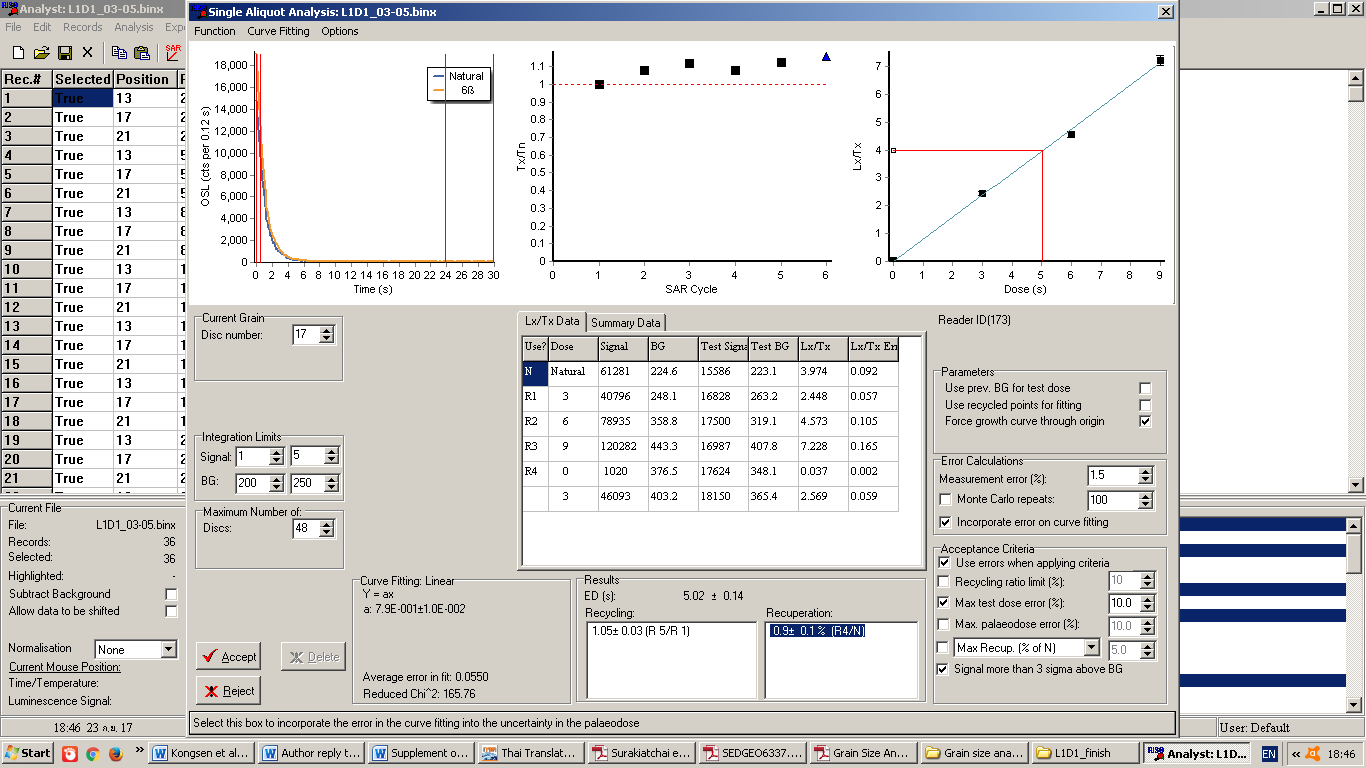


Recycling ratio = 1.05± 0.03 (R 5/R 1)

Recuperation = 0.9± 0.1 % (R4/N)

K1-5
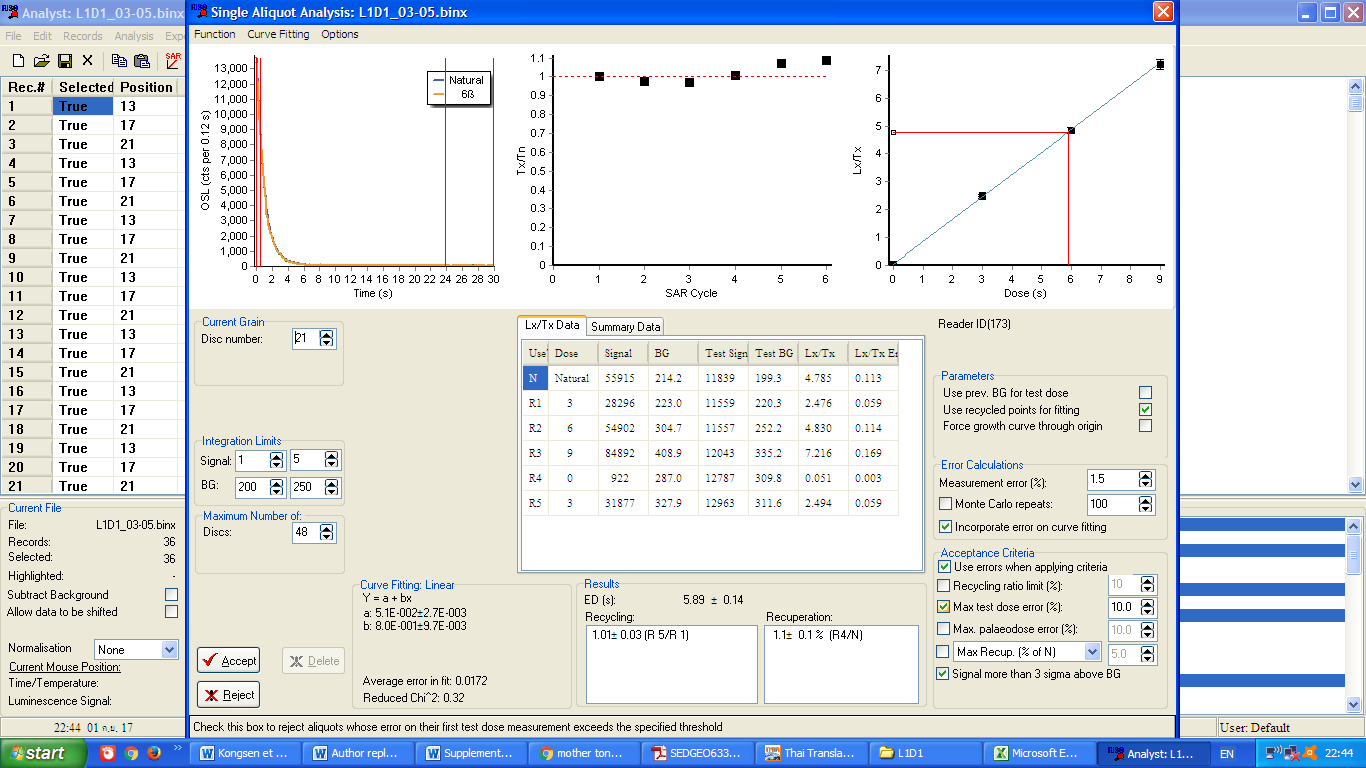
Recycling ratio = 1.01± 0.03 (R 5/R 1)

Recuperation = 1.1± 0.1 % (R4/N)

K2-1
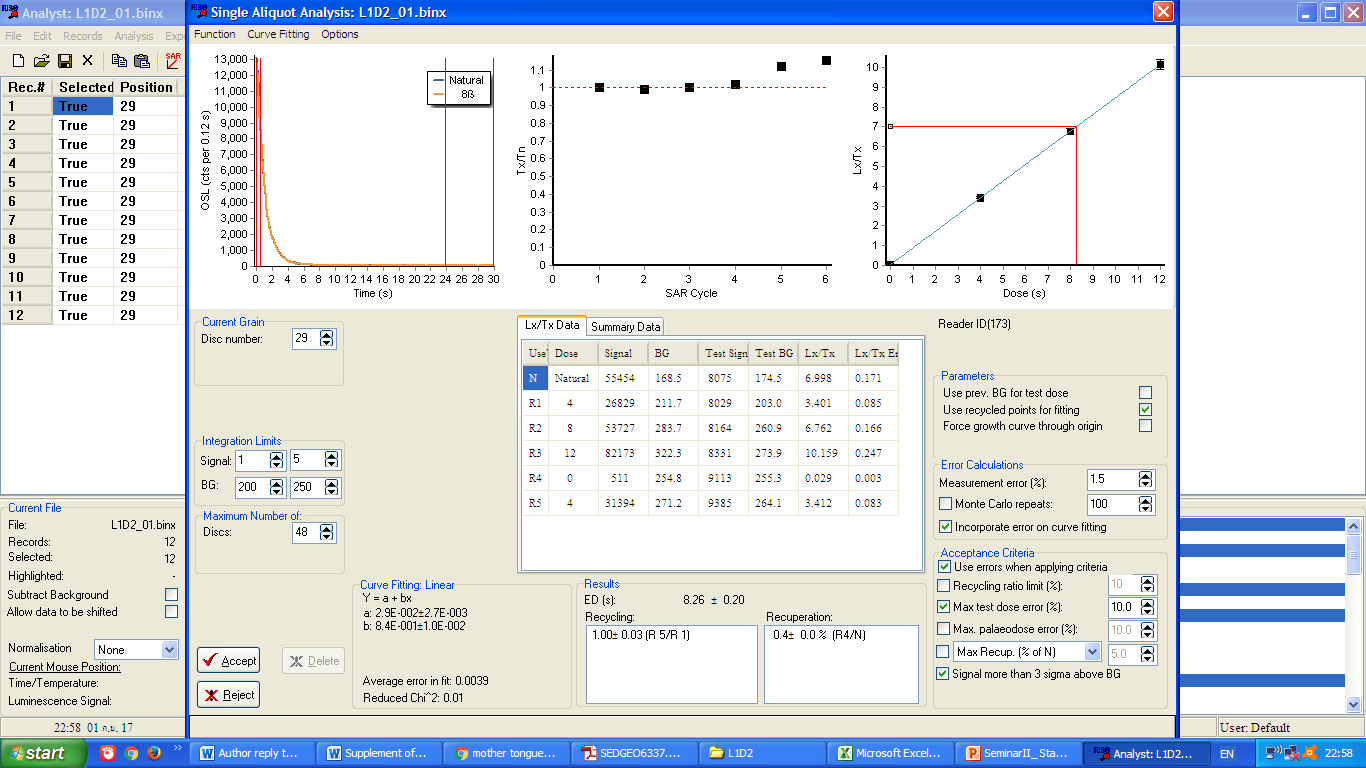
Recycling ratio = 1.00± 0.03 (R 5/R 1)

Recuperation = 0.4± 0.0 % (R4/N)

K2-2
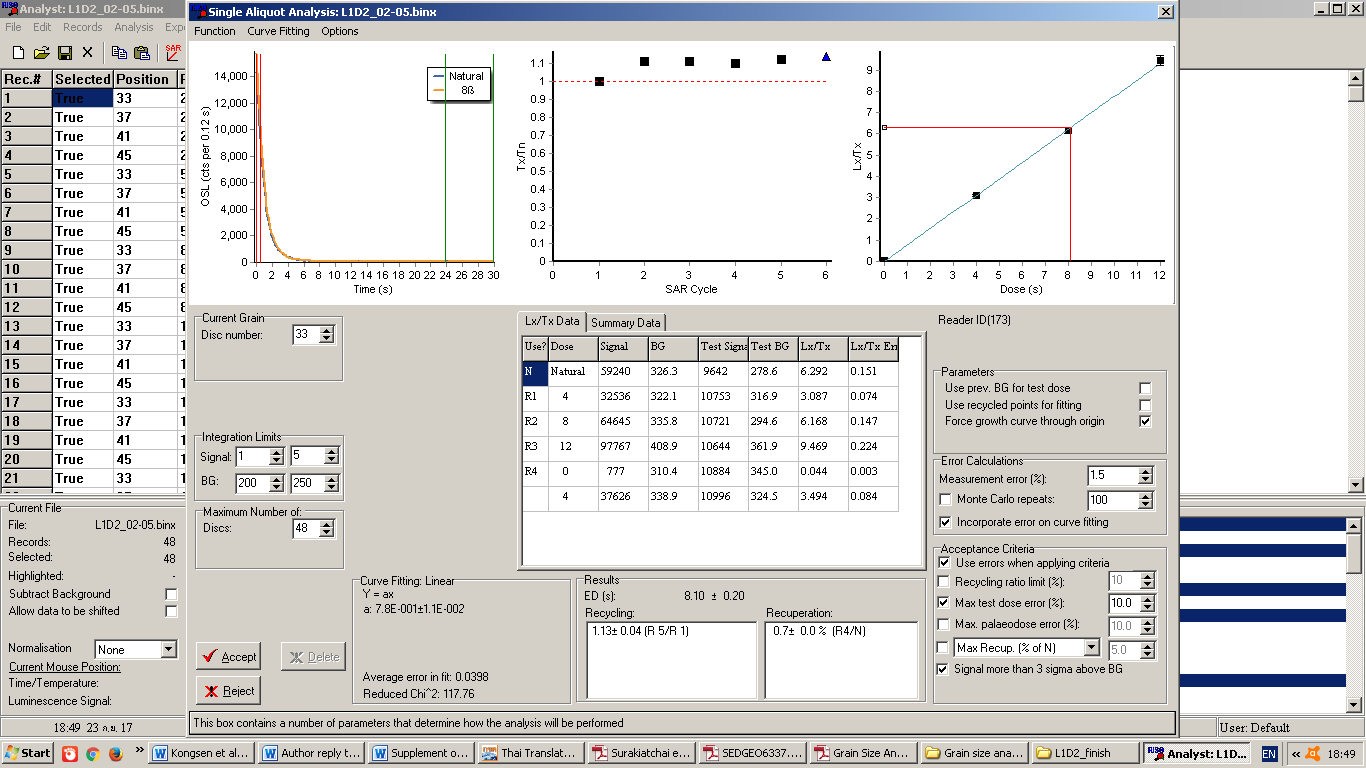


Recycling ratio = 1.13± 0.04 (R 5/R 1)

Recuperation = 0.7± 0.0 % (R4/N)

K2-3


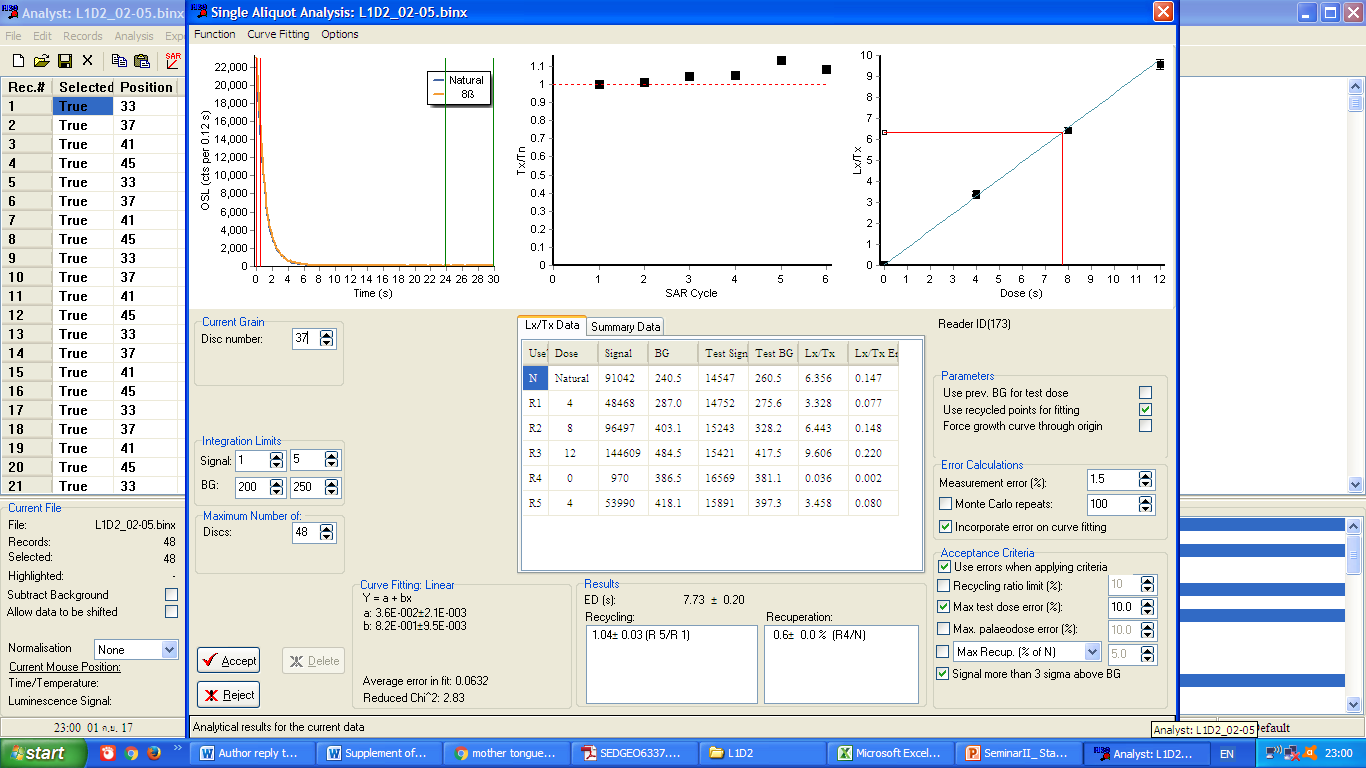
Recycling ratio = 1.04± 0.03 (R 5/R 1)

Recuperation = 0.6± 0.0 % (R4/N)

K2-4


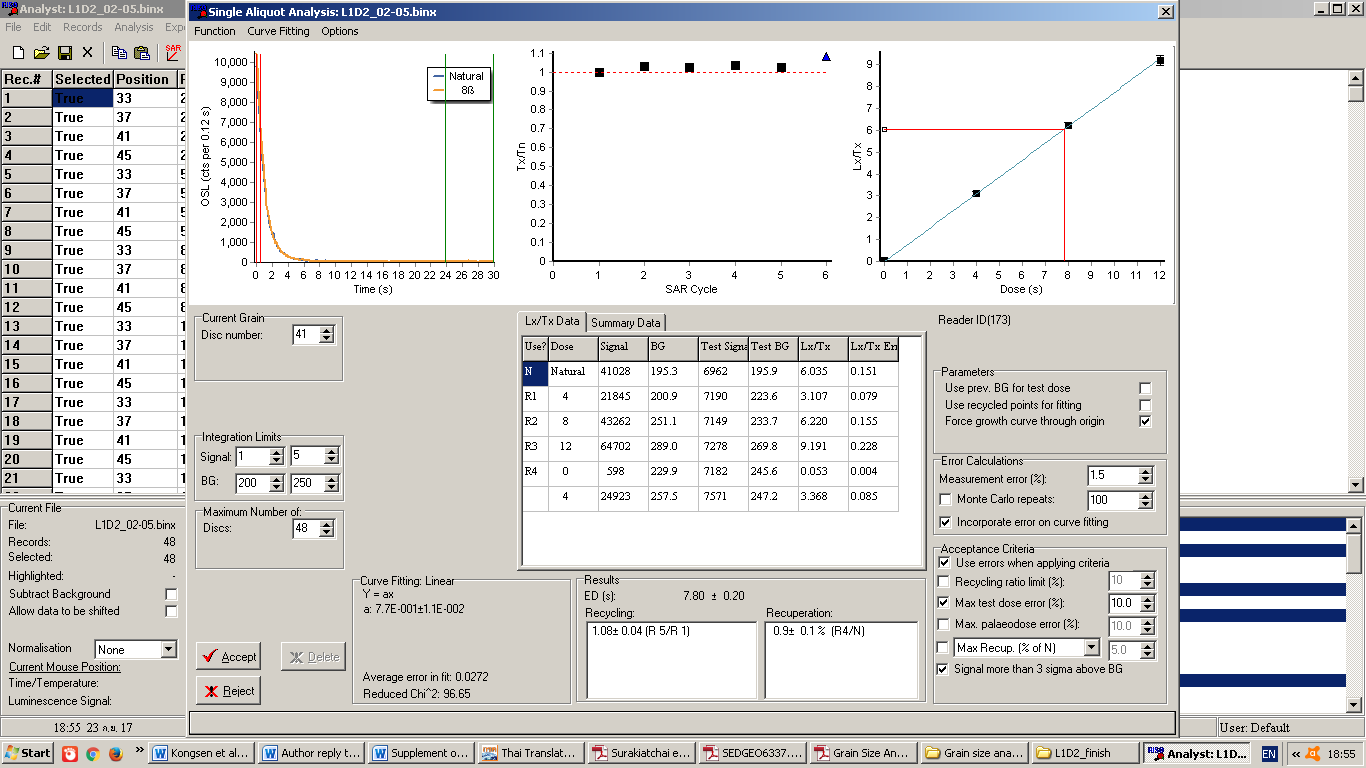
Recycling ratio = 1.08± 0.04 (R 5/R 1)

Recuperation = 0.9± 0.1 % (R4/N)

K2-5


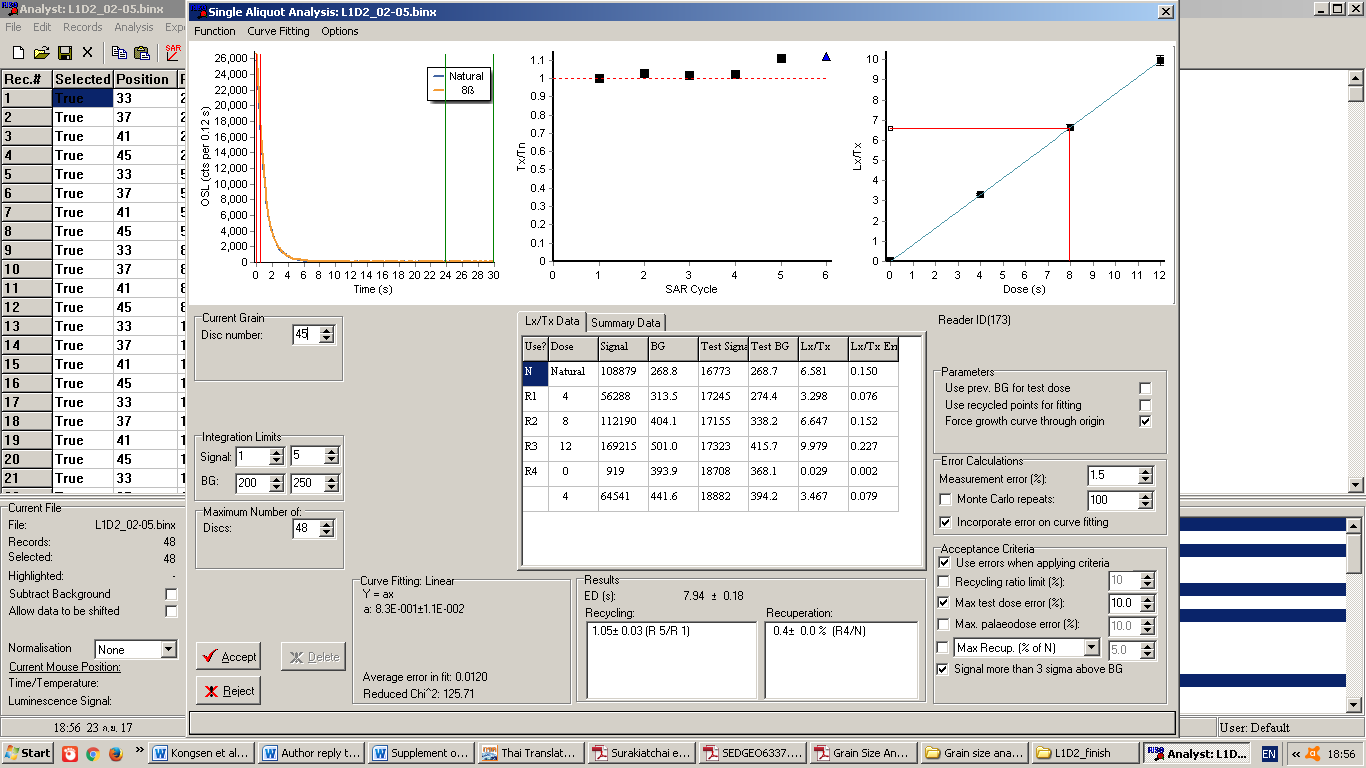
Recycling ratio = 1.05± 0.03 (R 5/R 1)

Recuperation = 0.4± 0.0 % (R4/N)

K3-1
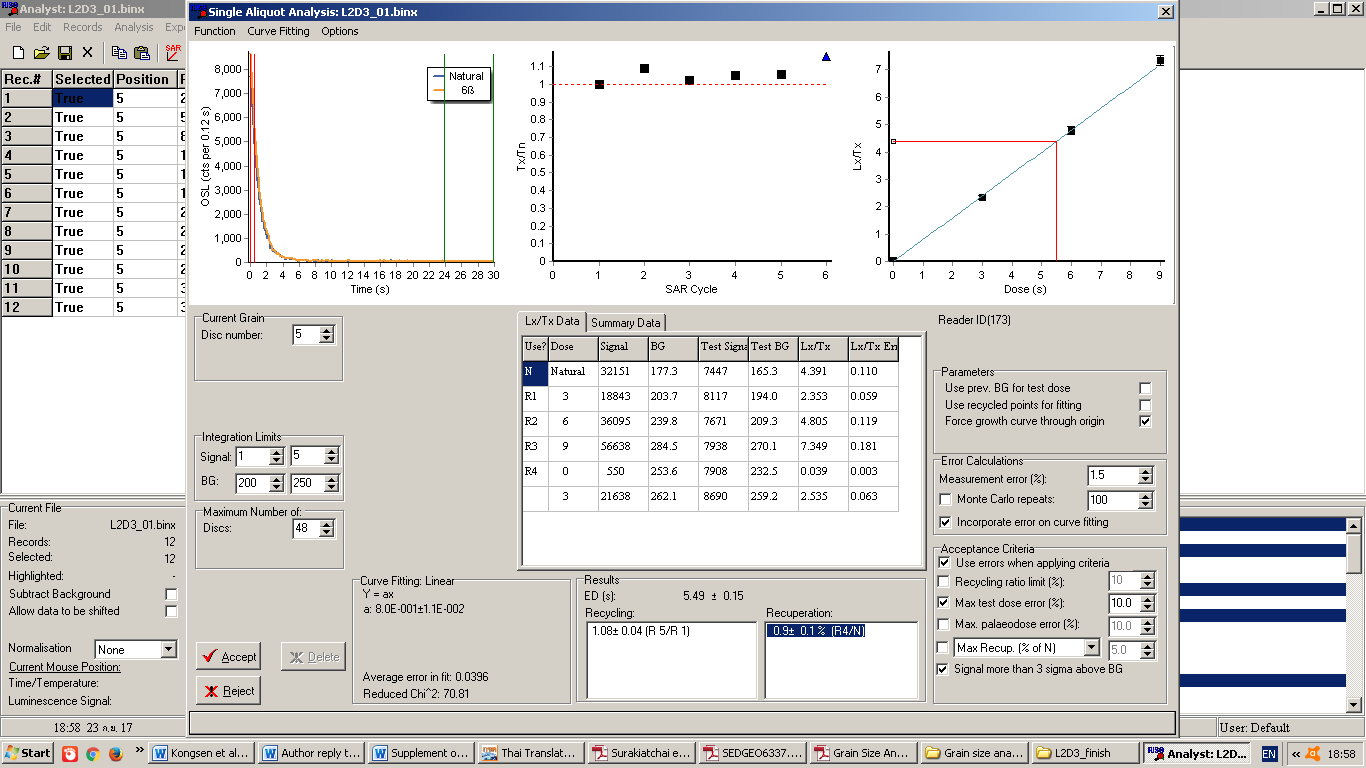


Recycling ratio = 1.08± 0.04 (R 5/R 1)

Recuperation = 0.9± 0.1 % (R4/N)

K3-2
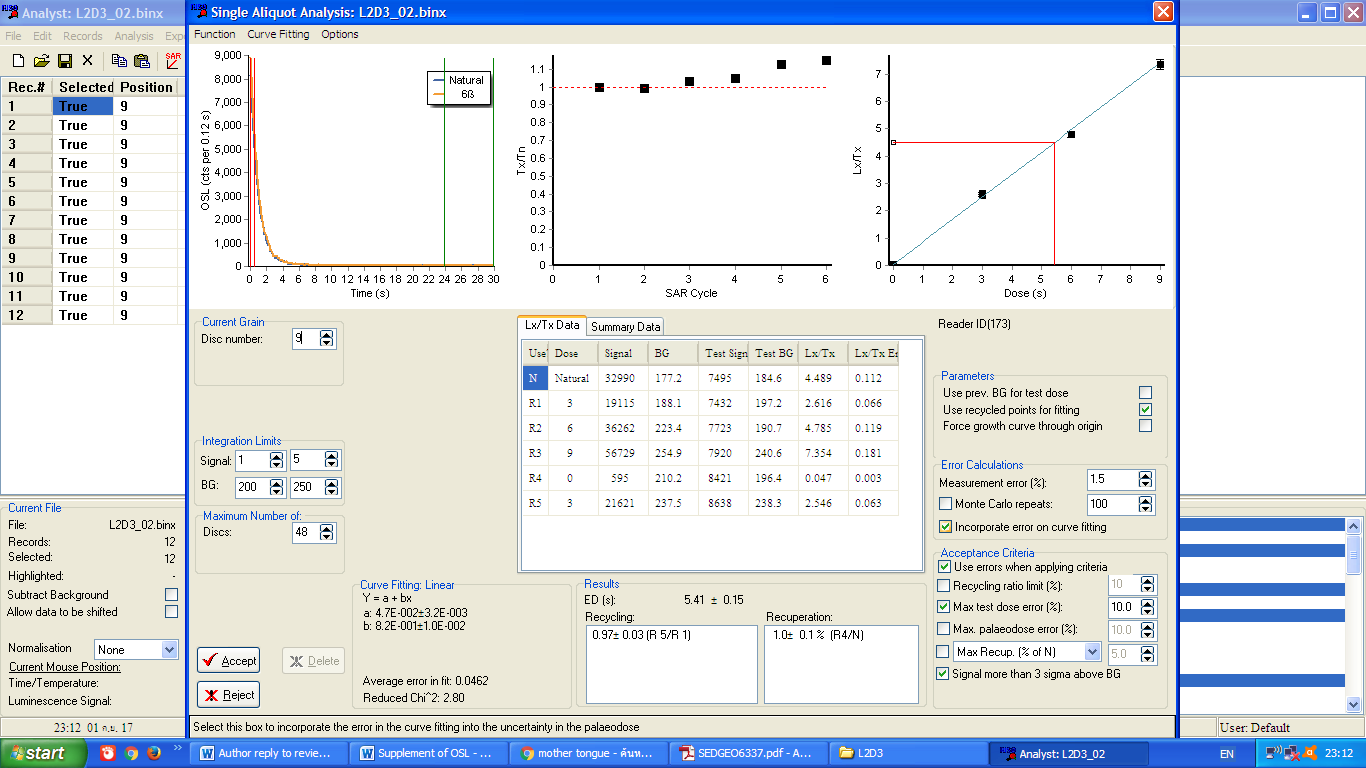
Recycling ratio = 0.97± 0.03 (R 5/R 1)

Recuperation = 1.0± 0.1 % (R4/N)

K3-3


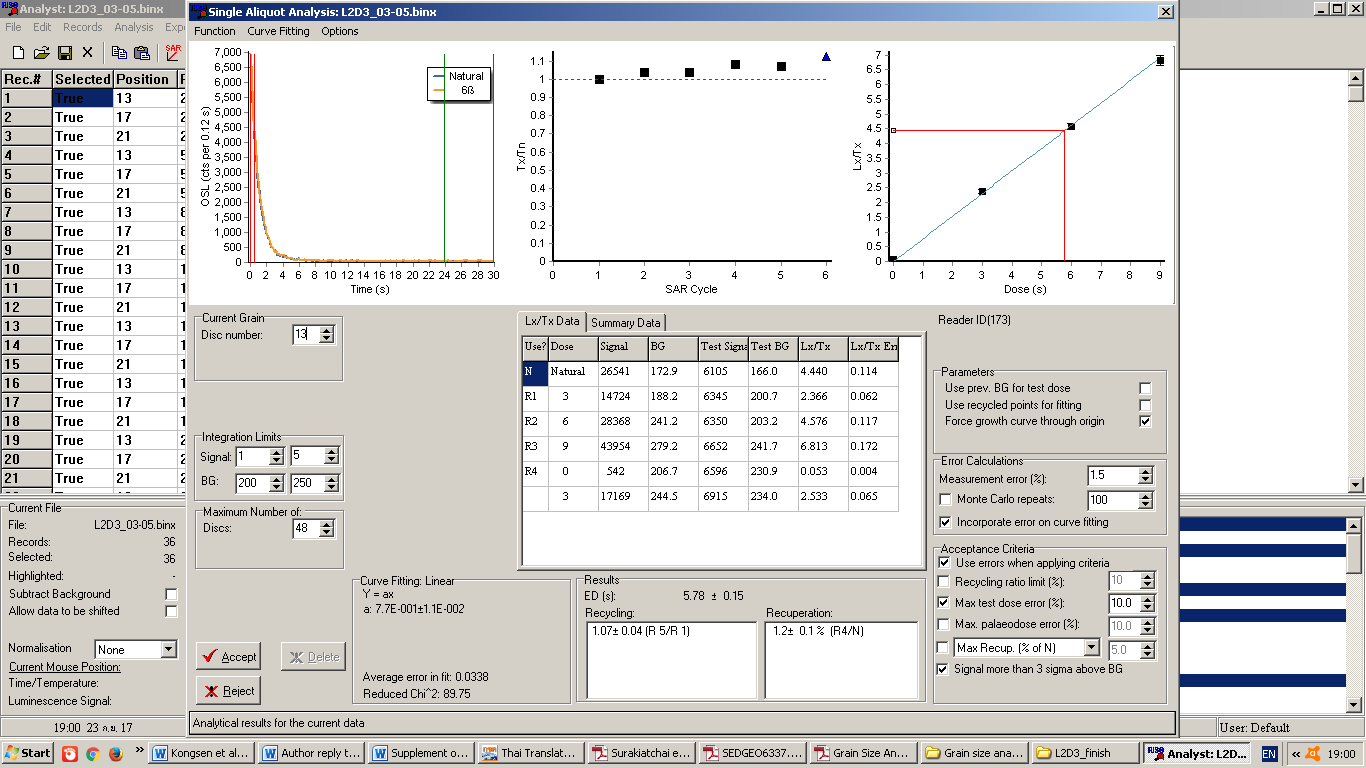


Recycling ratio = 1.07± 0.04 (R 5/R 1)

Recuperation = 1.2± 0.1 % (R4/N)

K3-4
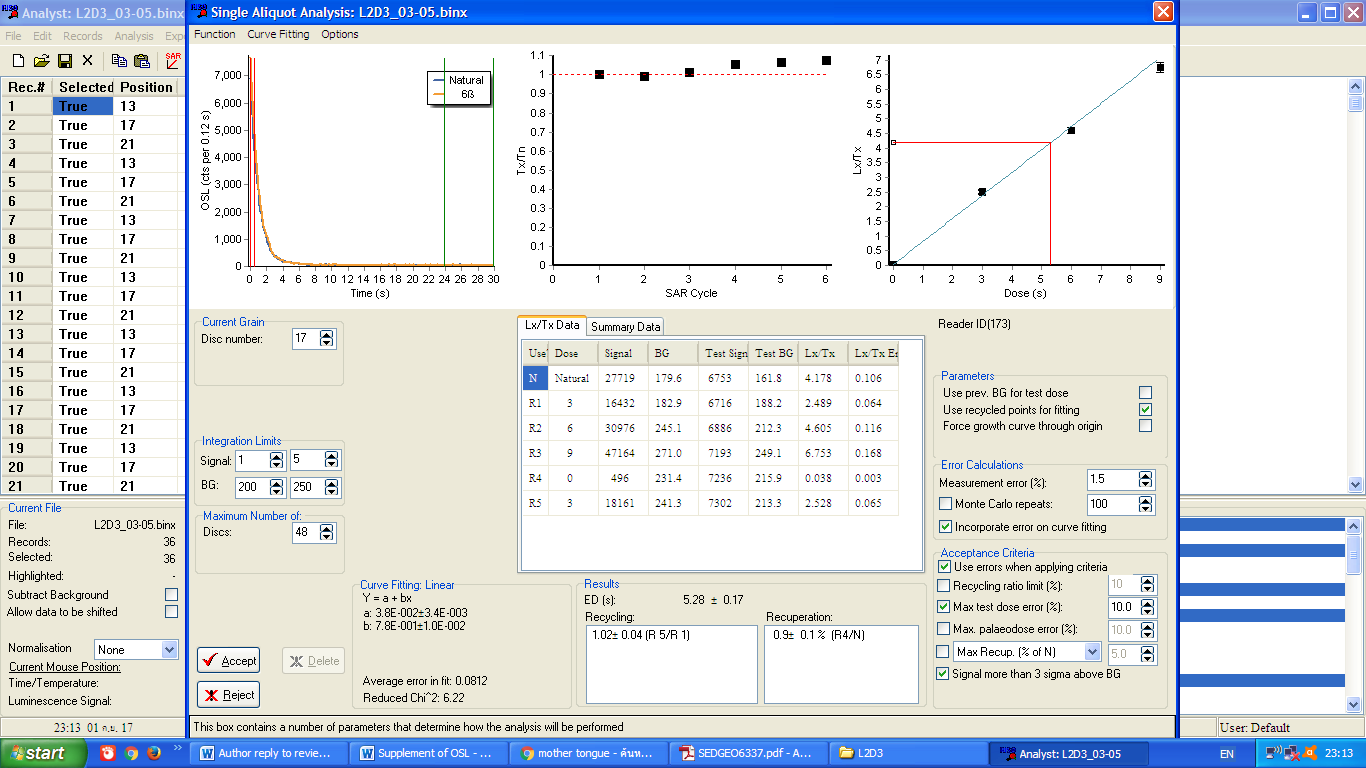
Recycling ratio = 1.02± 0.04 (R 5/R 1)

Recuperation = 0.9± 0.1 % (R4/N)

K3-5


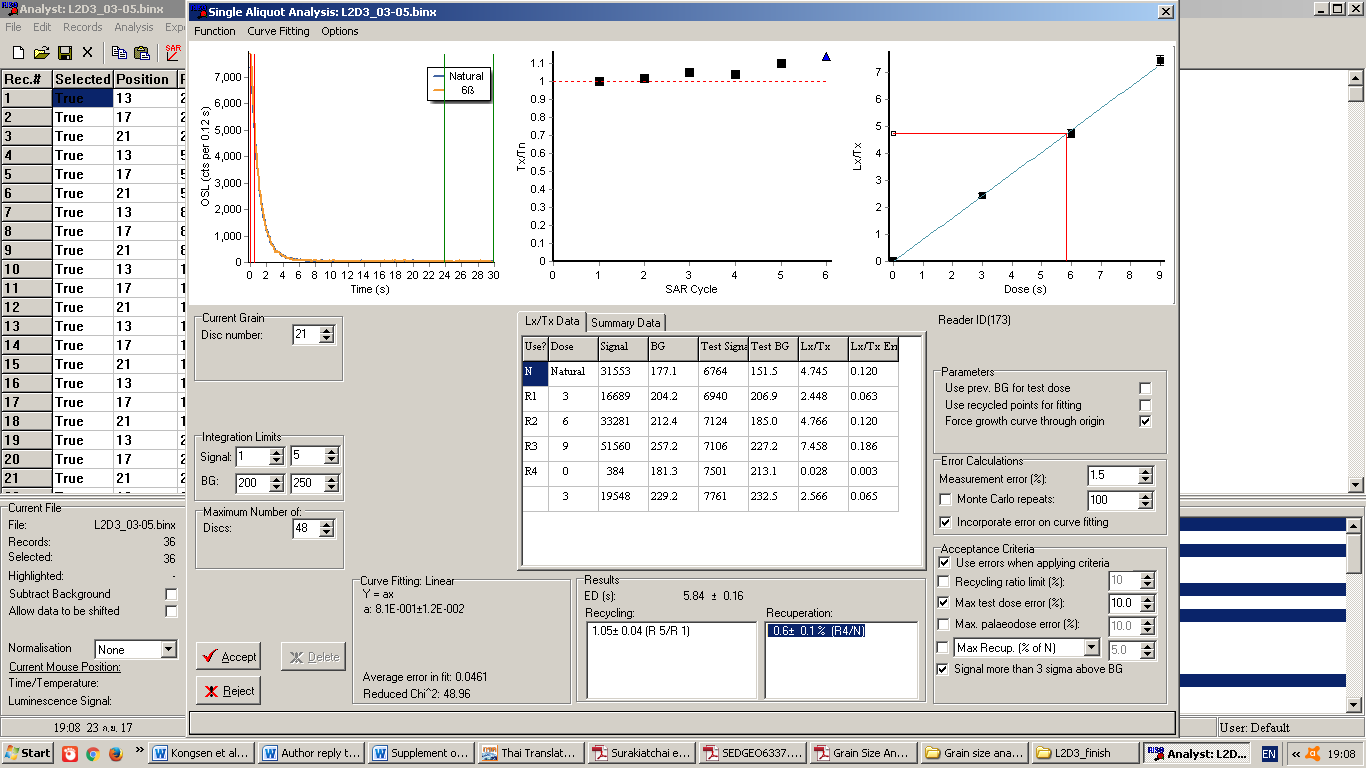


Recycling ratio = 1.05± 0.04 (R 5/R 1)

Recuperation = 0.6± 0.1 % (R4/N)

K4-1
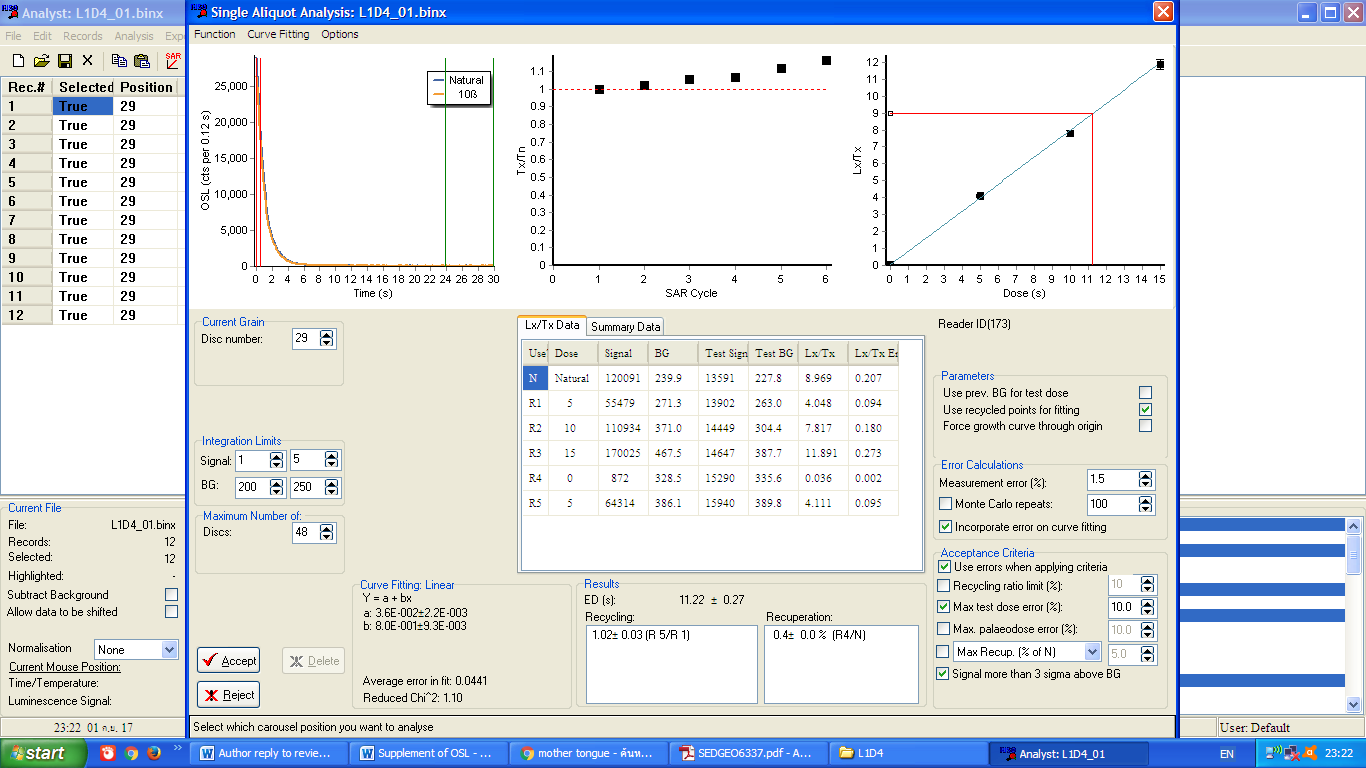
Recycling ratio = 1.02± 0.03 (R 5/R 1)

Recuperation = 0.4± 0.0 % (R4/N)

K4-2
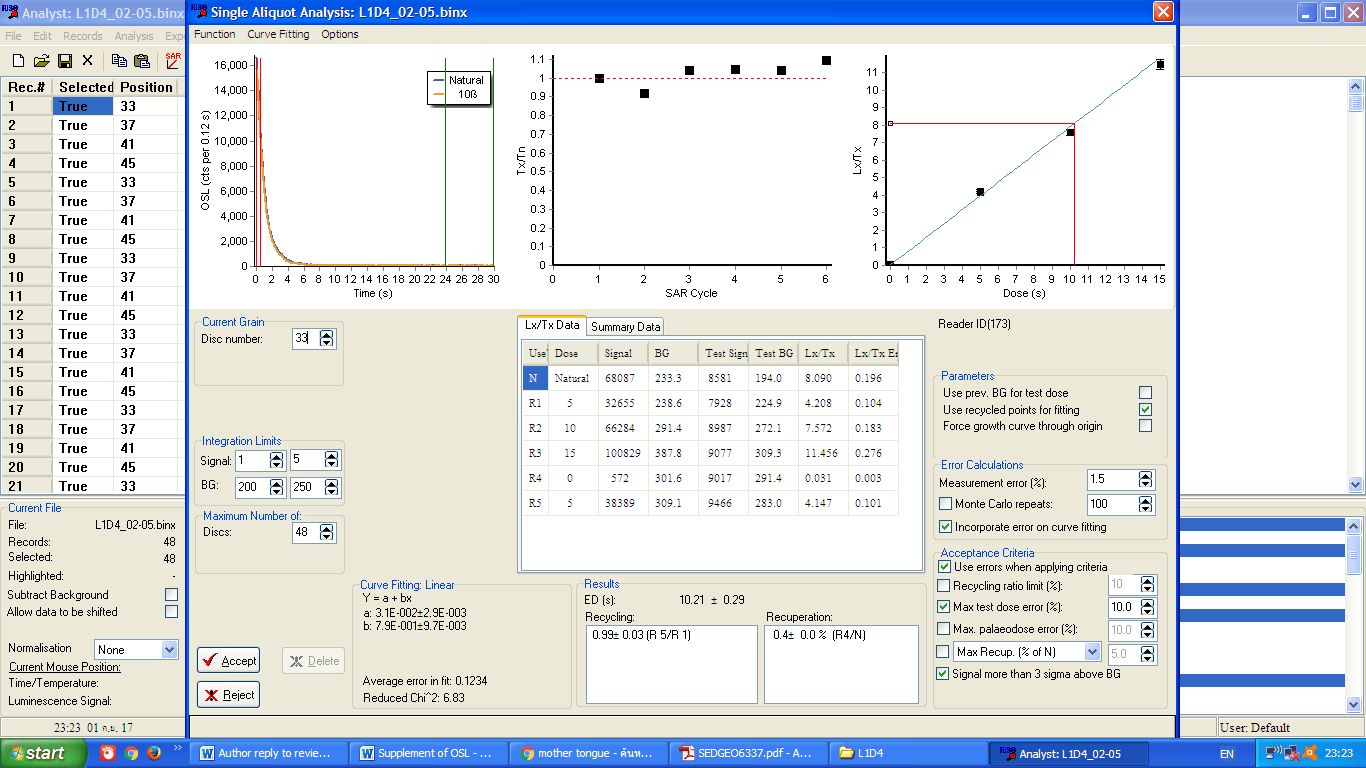
Recycling ratio = 0.99± 0.03 (R 5/R 1)

Recuperation = 0.4± 0.0 % (R4/N)

K4-3
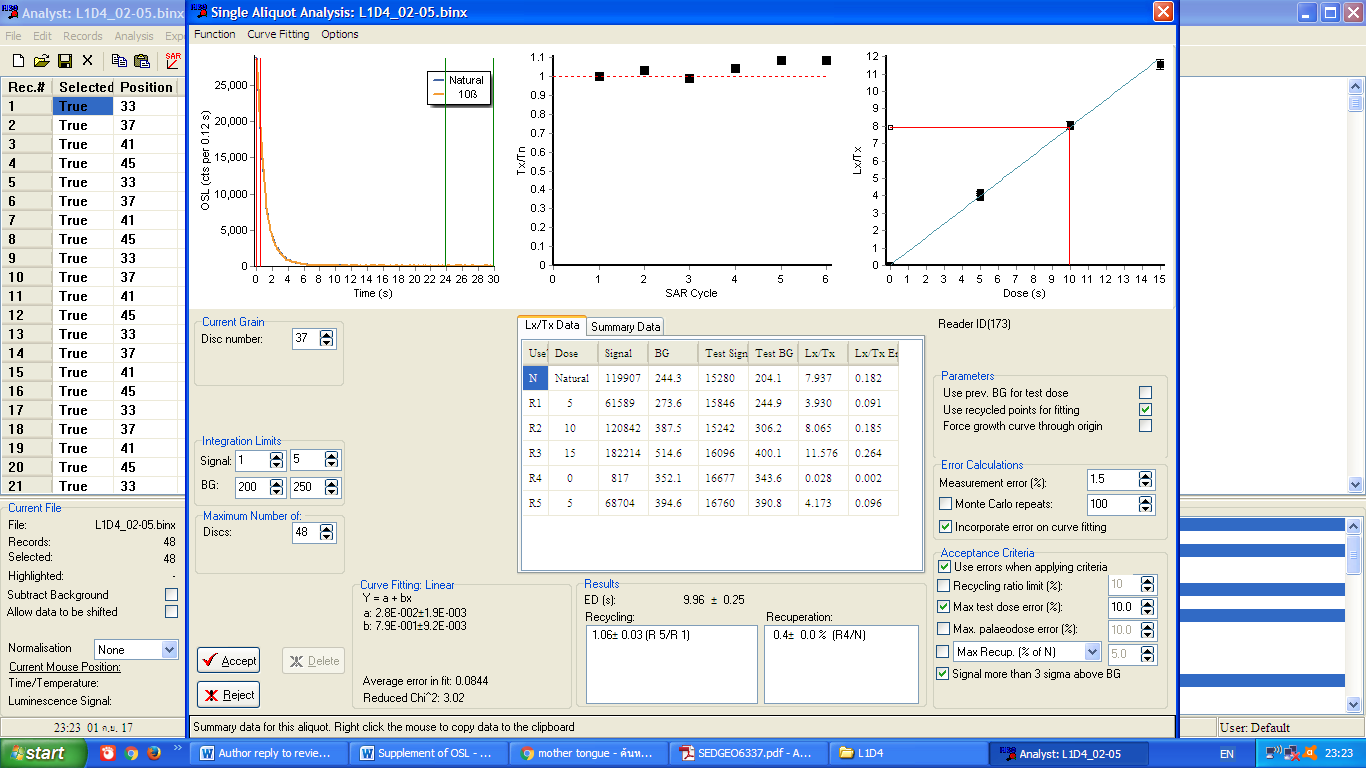
Recycling ratio = 1.06± 0.03 (R 5/R 1)

Recuperation = 0.4± 0.0 % (R4/N)

K4-4
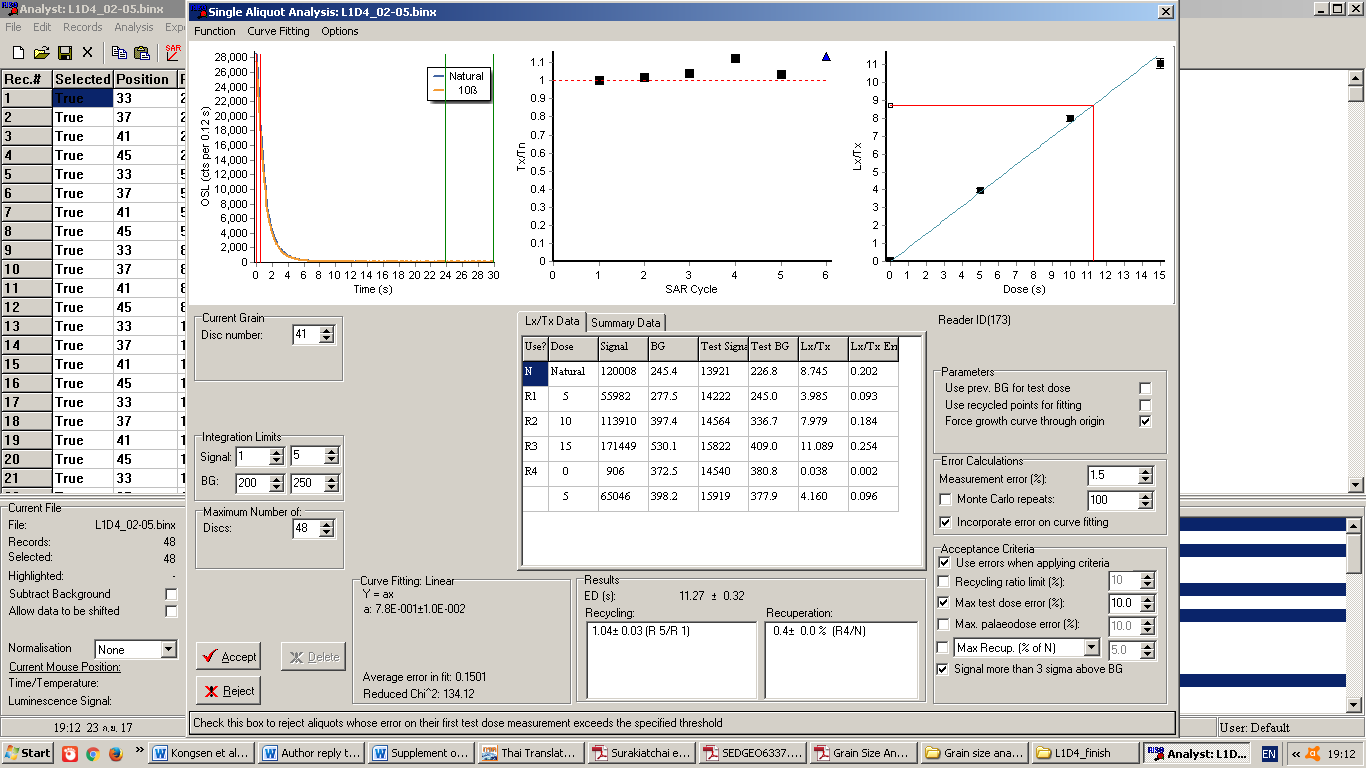


Recycling ratio = 1.04± 0.03 (R 5/R 1)

Recuperation = 0.4± 0.0 % (R4/N)

K4-5
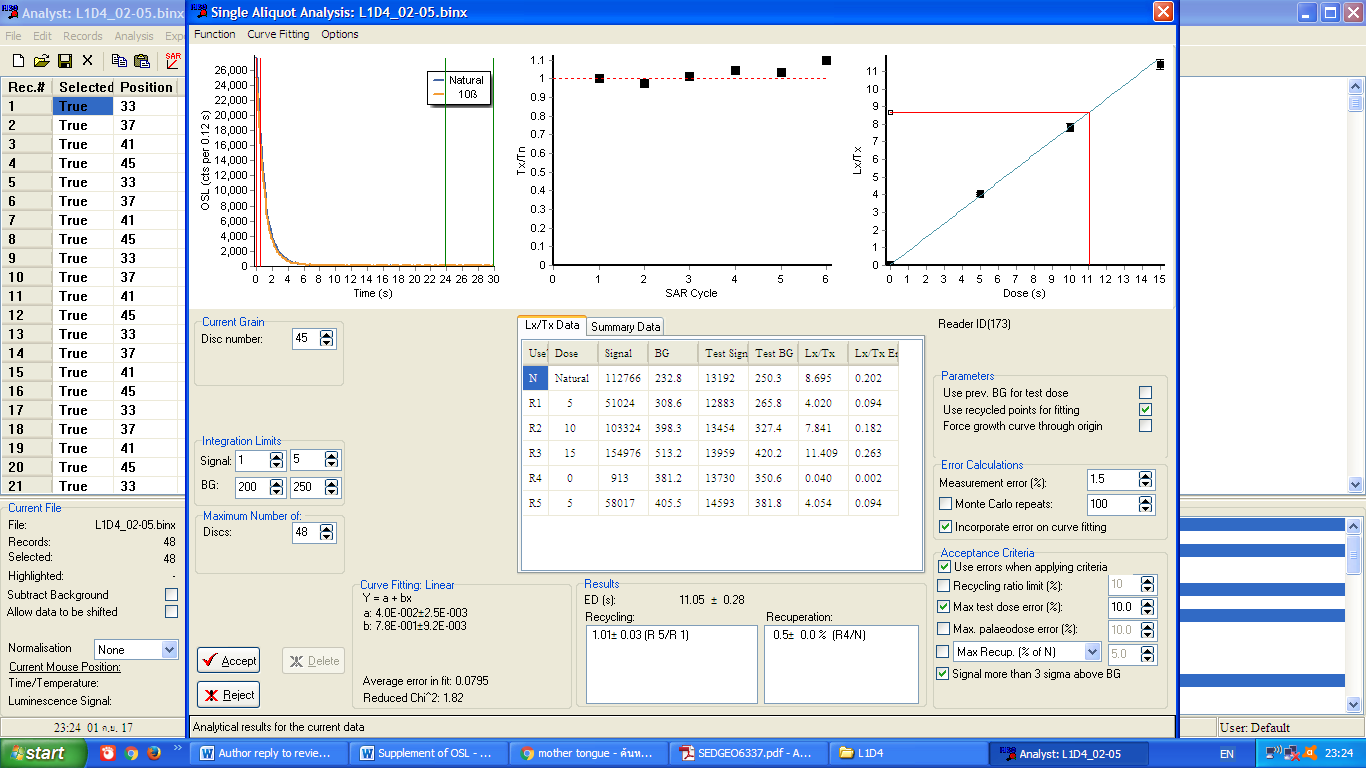
Recycling ratio = 1.01± 0.03 (R 5/R 1)

Recuperation = 0.5± 0.0 % (R4/N)

K5-1
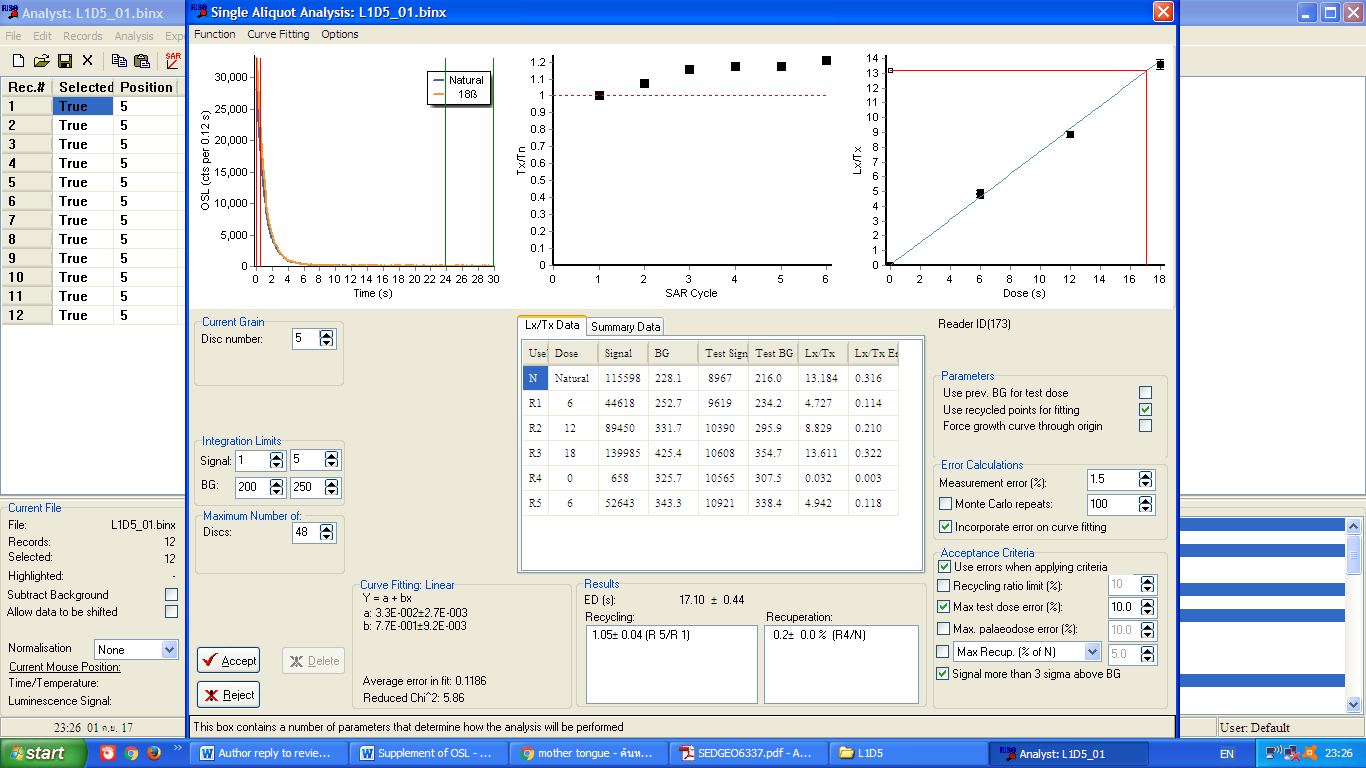
Recycling ratio = 1.05± 0.04 (R 5/R 1)

Recuperation = 0.2± 0.0 % (R4/N)

K5-2
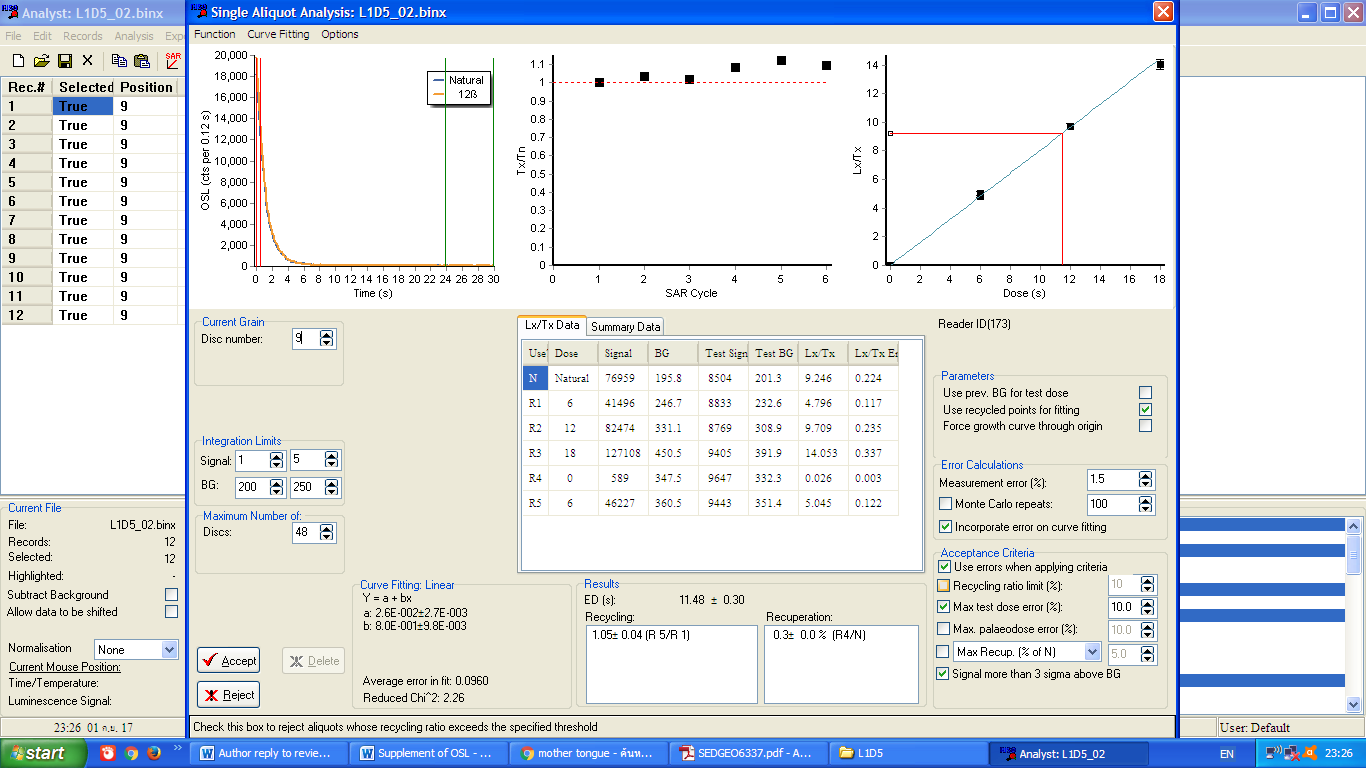
Recycling ratio = 1.05± 0.04 (R 5/R 1)

Recuperation = 0.3± 0.0 % (R4/N)

K5-3
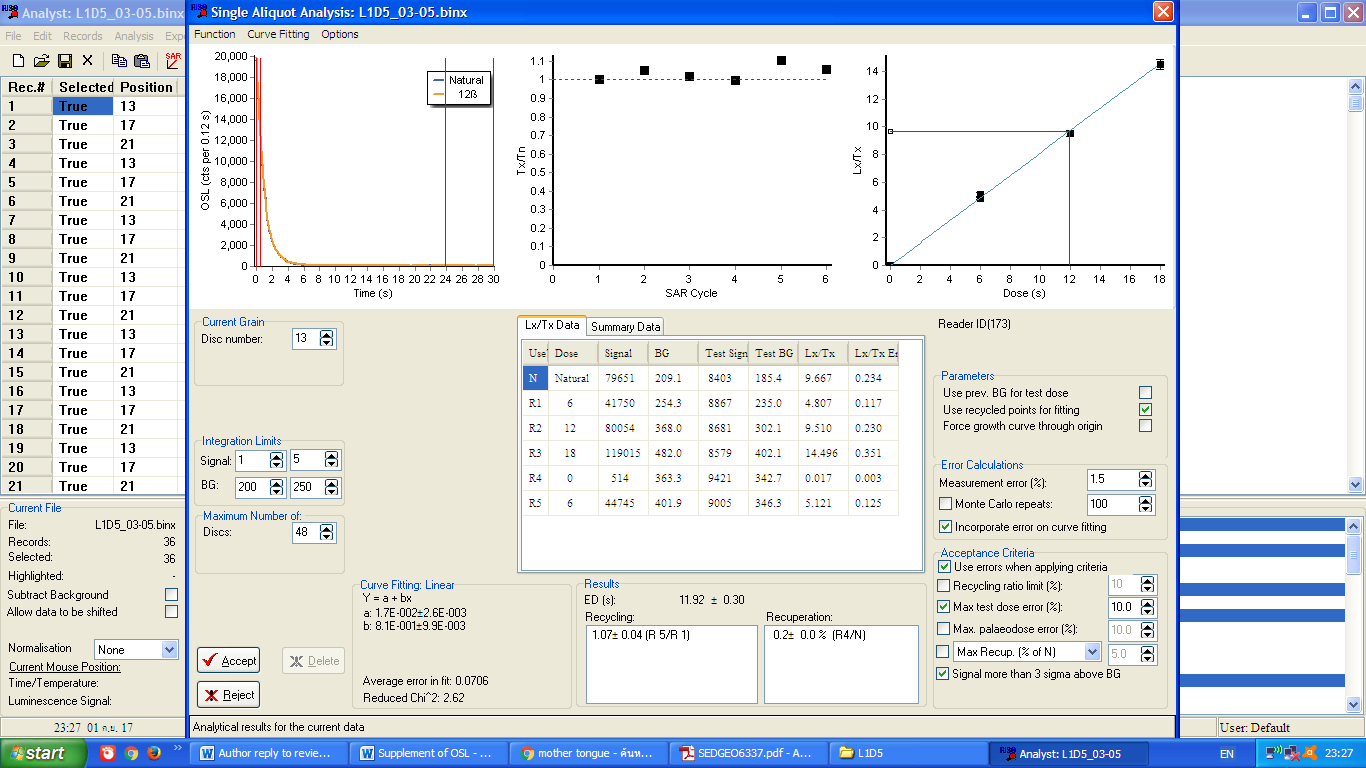
Recycling ratio = 1.07± 0.04 (R 5/R 1)

Recuperation = 0.2± 0.0 % (R4/N)

K5-4
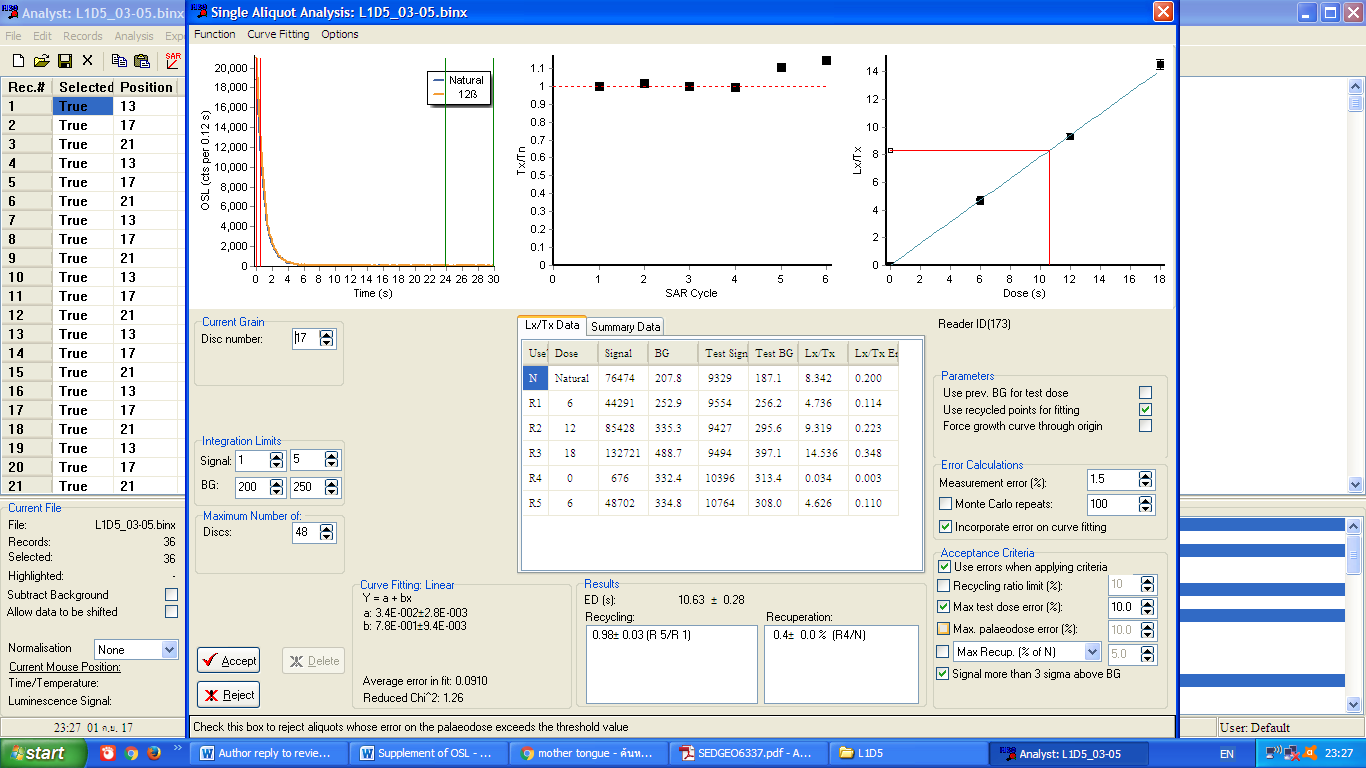
Recycling ratio = 0.98± 0.03 (R 5/R 1)

Recuperation = 0.4± 0.0 % (R4/N)

K5-5
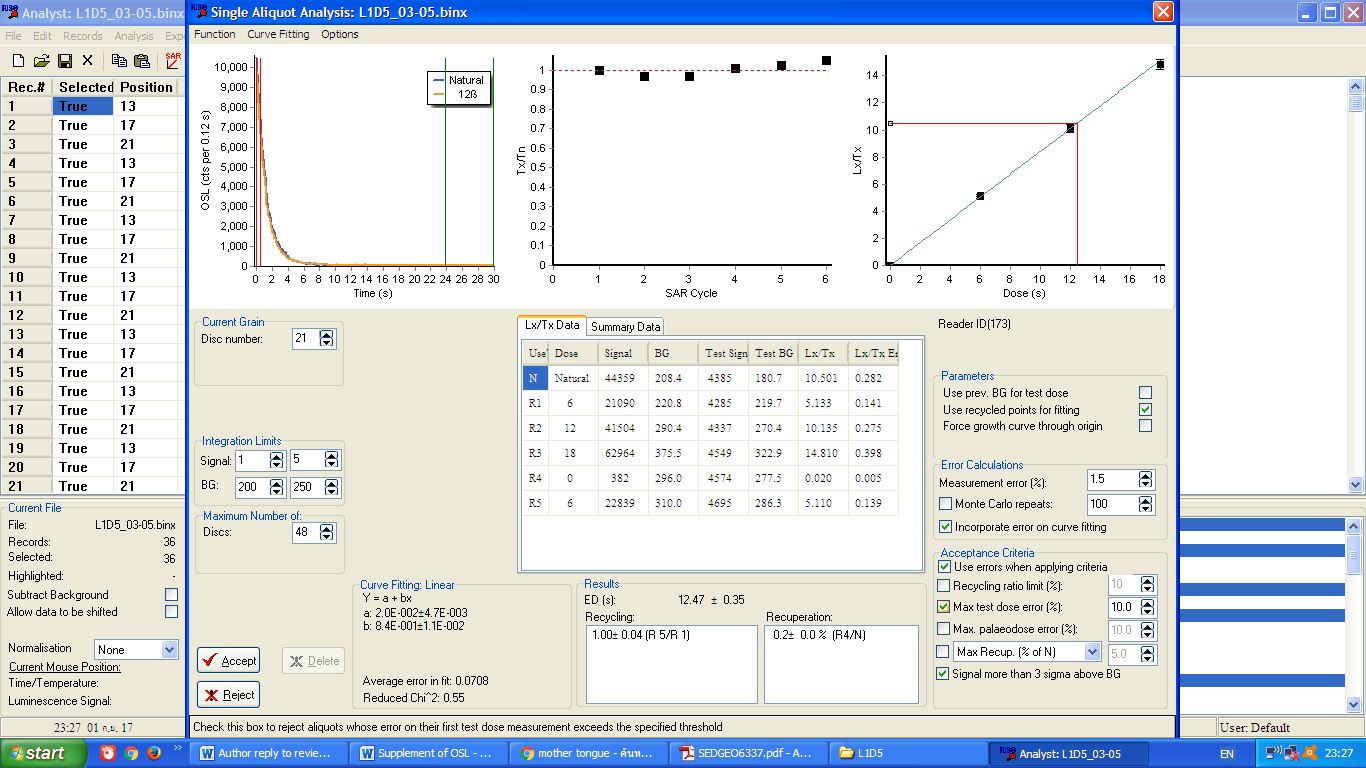
Recycling ratio = 1.00± 0.04 (R 5/R 1)

Recuperation = 0.2± 0.0 % (R4/N)

K6-1


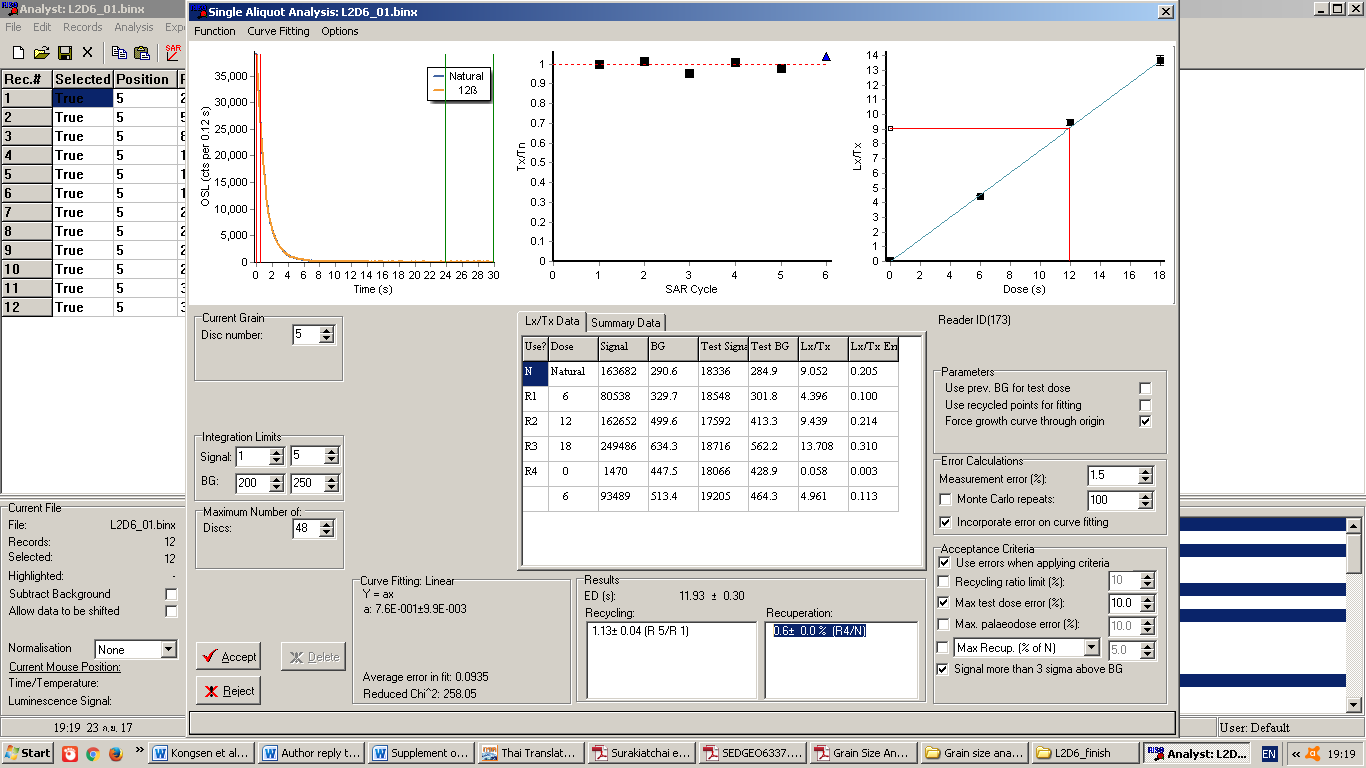


Recycling ratio = 1.13± 0.04 (R 5/R 1)

Recuperation = 0.6± 0.0 % (R4/N)

K6-2
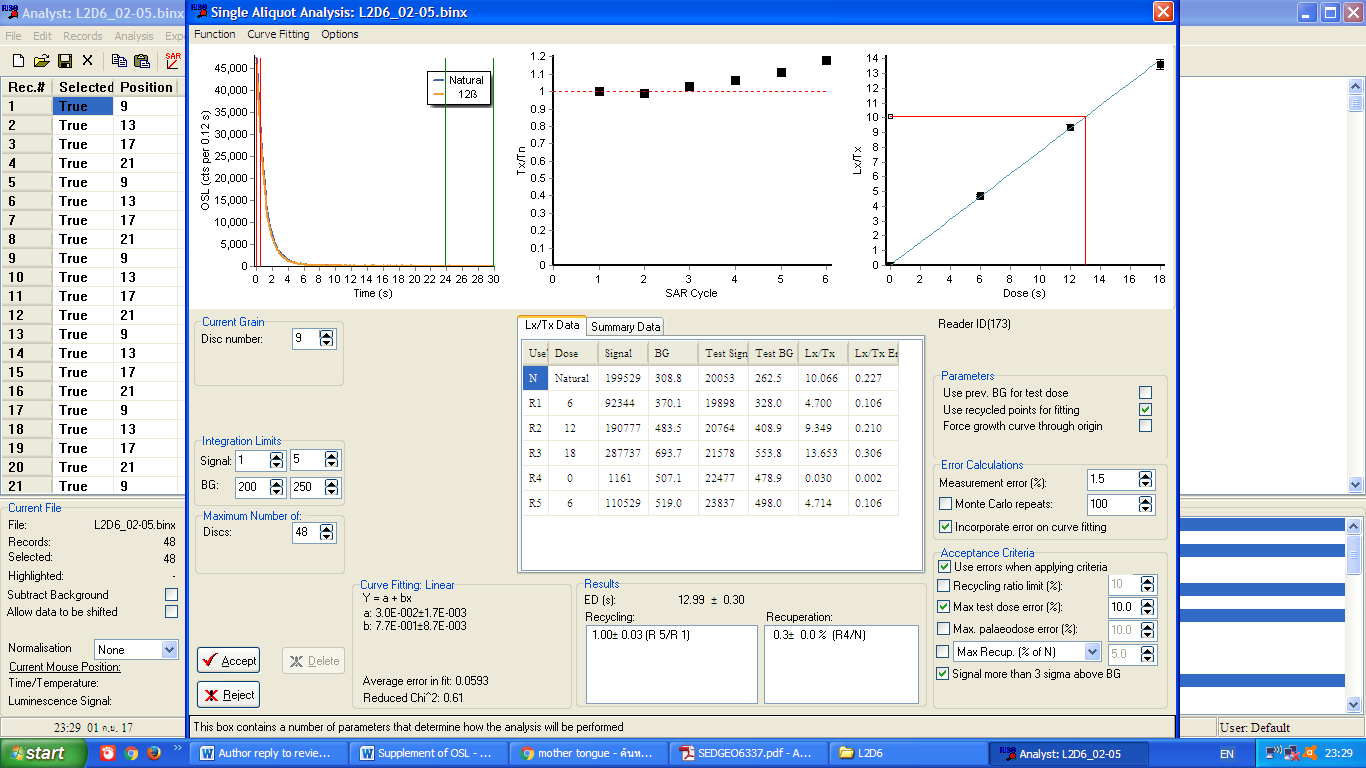
Recycling ratio = 1.00± 0.03 (R 5/R 1)

Recuperation = 0.3± 0.0 % (R4/N)

K6-3
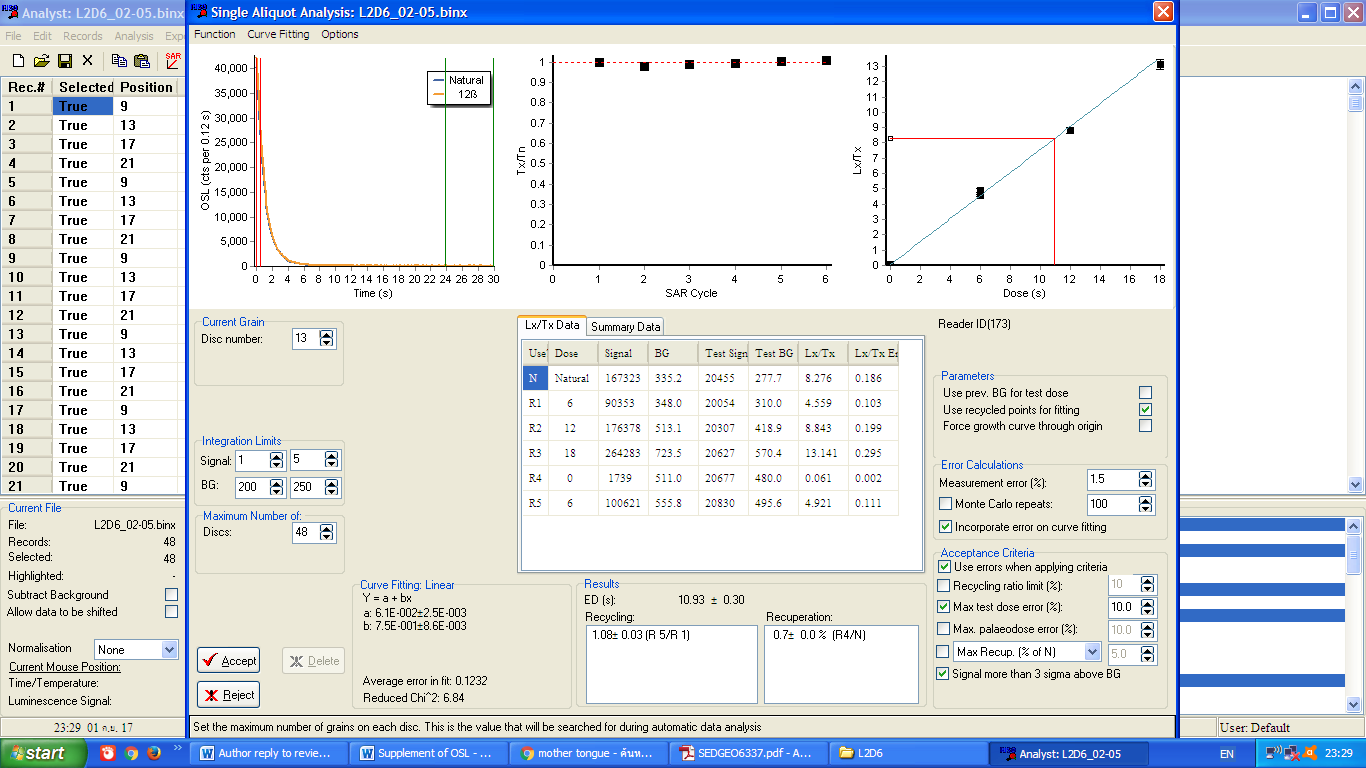
Recycling ratio = 1.08± 0.03 (R 5/R 1)

Recuperation = 0.7± 0.0 % (R4/N)

K6-4
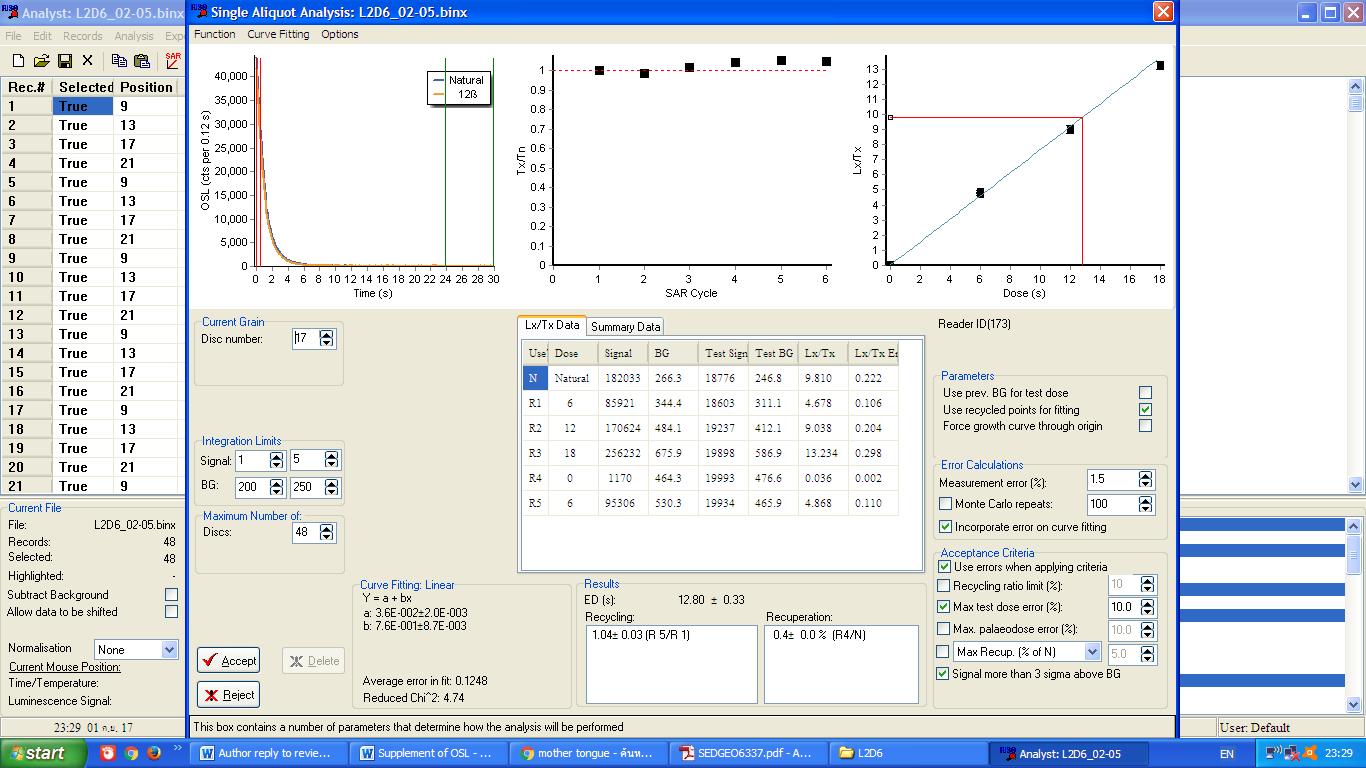
Recycling ratio = 1.04± 0.03 (R 5/R 1)

Recuperation = 0.4± 0.0 % (R4/N)

K6-5
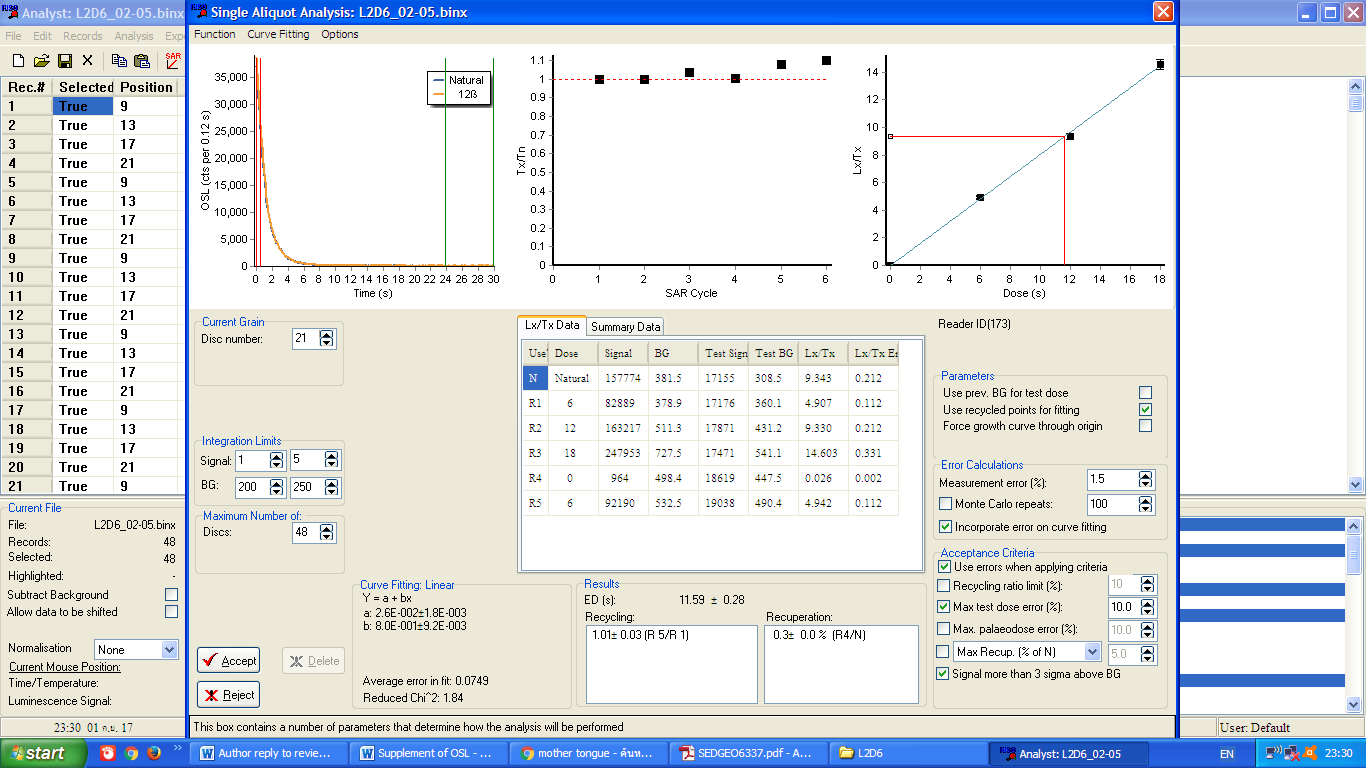
Recycling ratio = 1.01± 0.03 (R 5/R 1)

Recuperation = 0.3± 0.0 % (R4/N)

K7-1
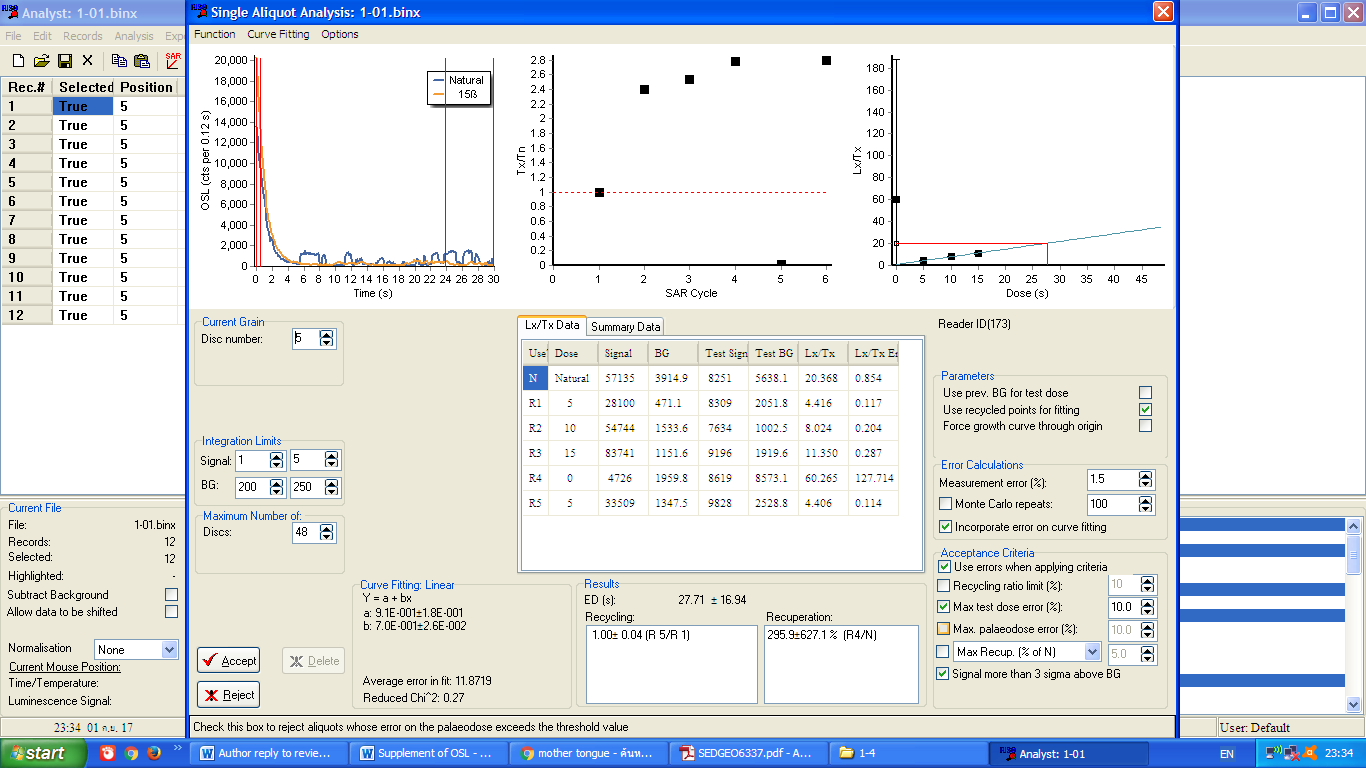
Recycling ratio = 1.00± 0.04 (R 5/R 1)

Recuperation = 295.9±627.1 % (R4/N)

K7-2
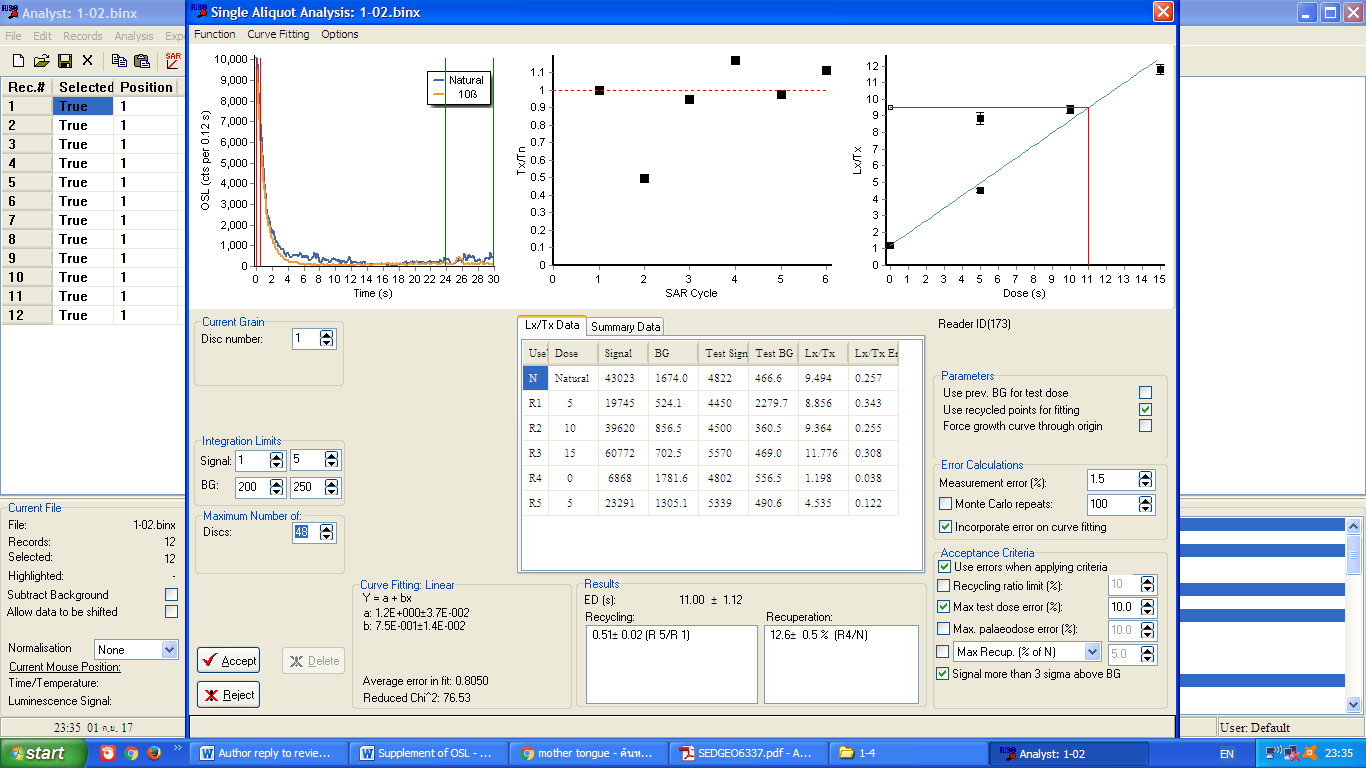
Recycling ratio = 0.51± 0.02 (R 5/R 1)

Recuperation = 12.6± 0.5 % (R4/N)

K7-3
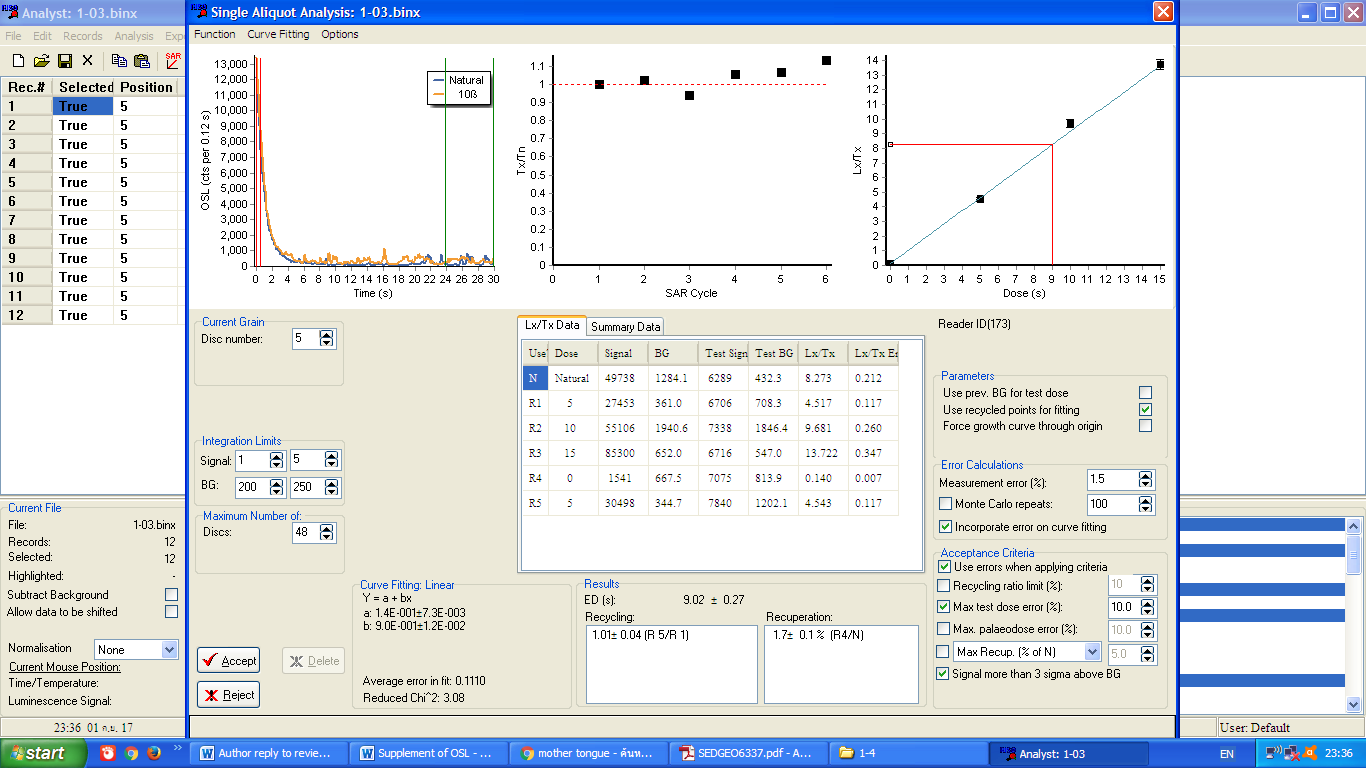
Recycling ratio = 1.01± 0.04 (R 5/R 1)

Recuperation = 1.7± 0.1 % (R4/N)

K7-4


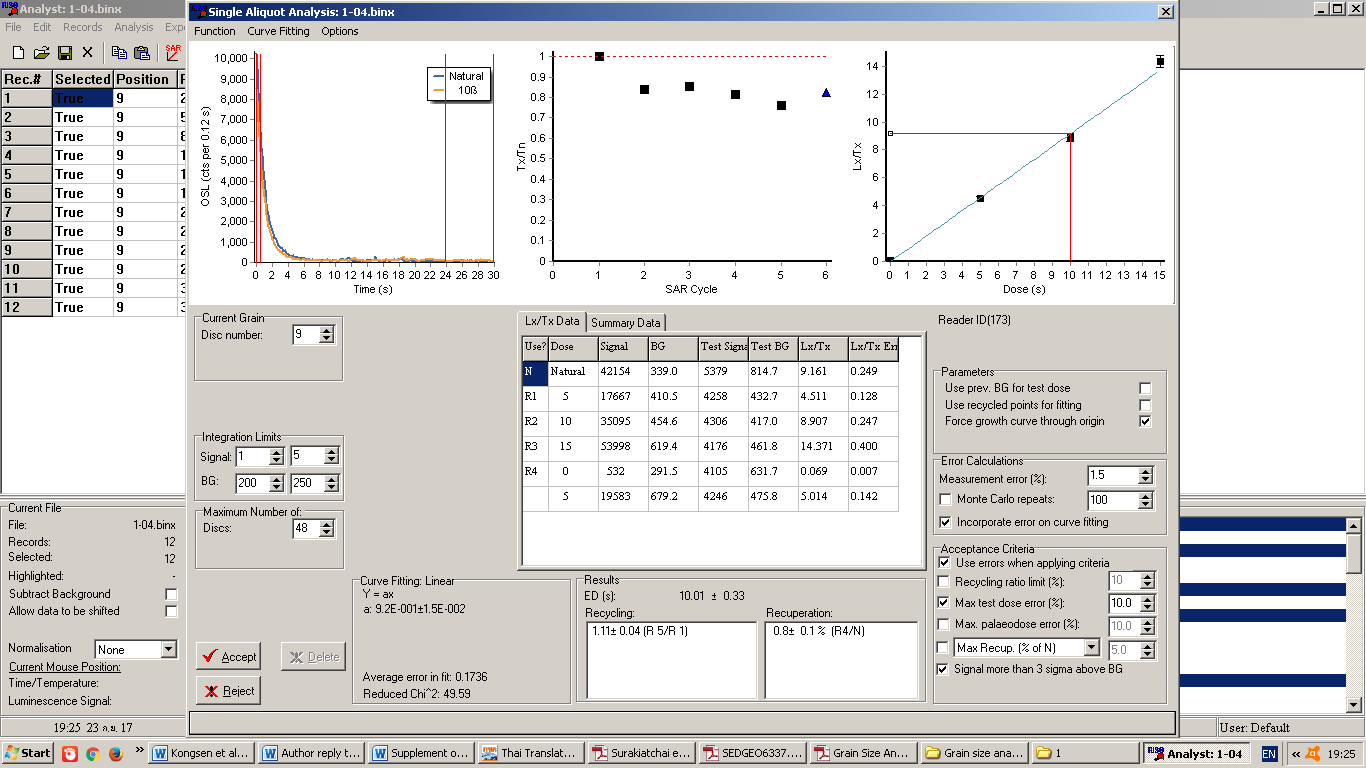


Recycling ratio = 1.11± 0.04 (R 5/R 1)

Recuperation = 0.8± 0.1 % (R4/N)

K7-5


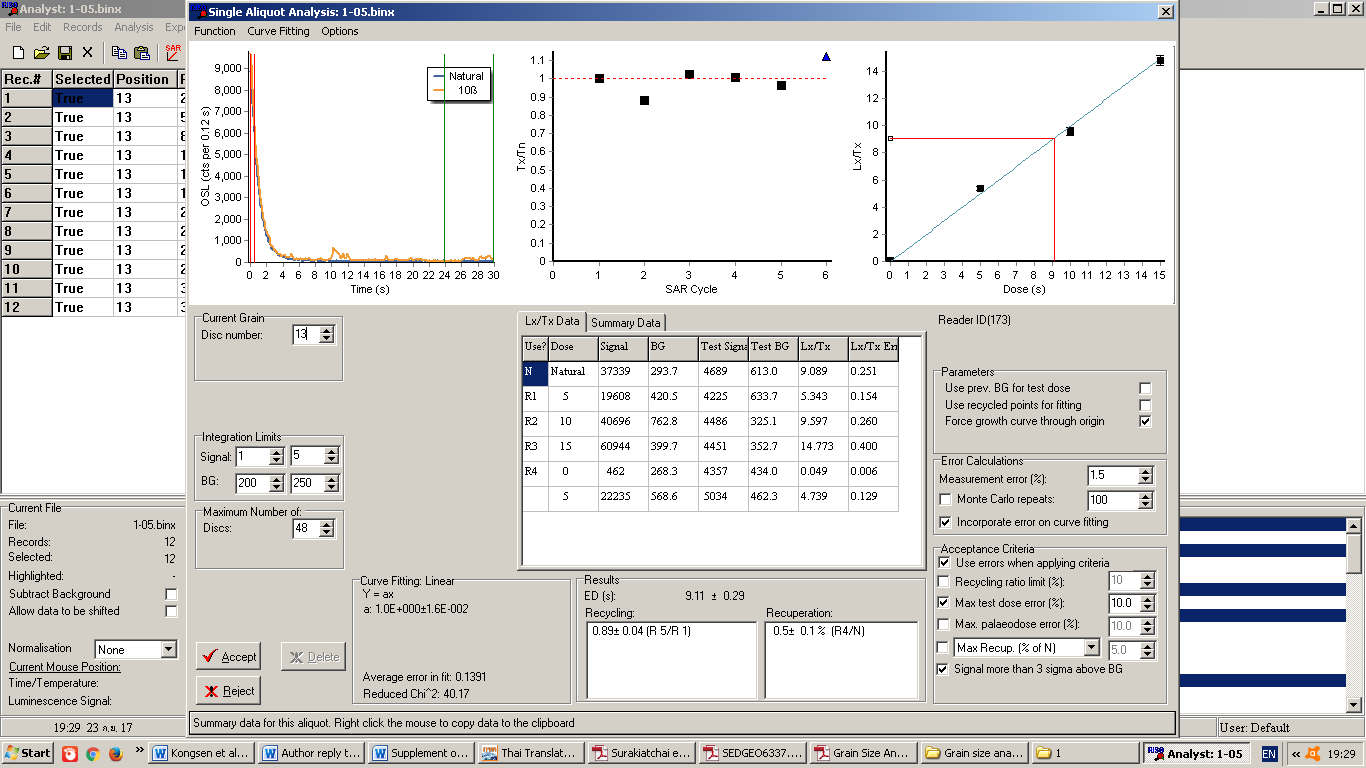


Recycling ratio = 0.89± 0.04 (R 5/R 1)

Recuperation = 0.5± 0.1 % (R4/N)

K7-6


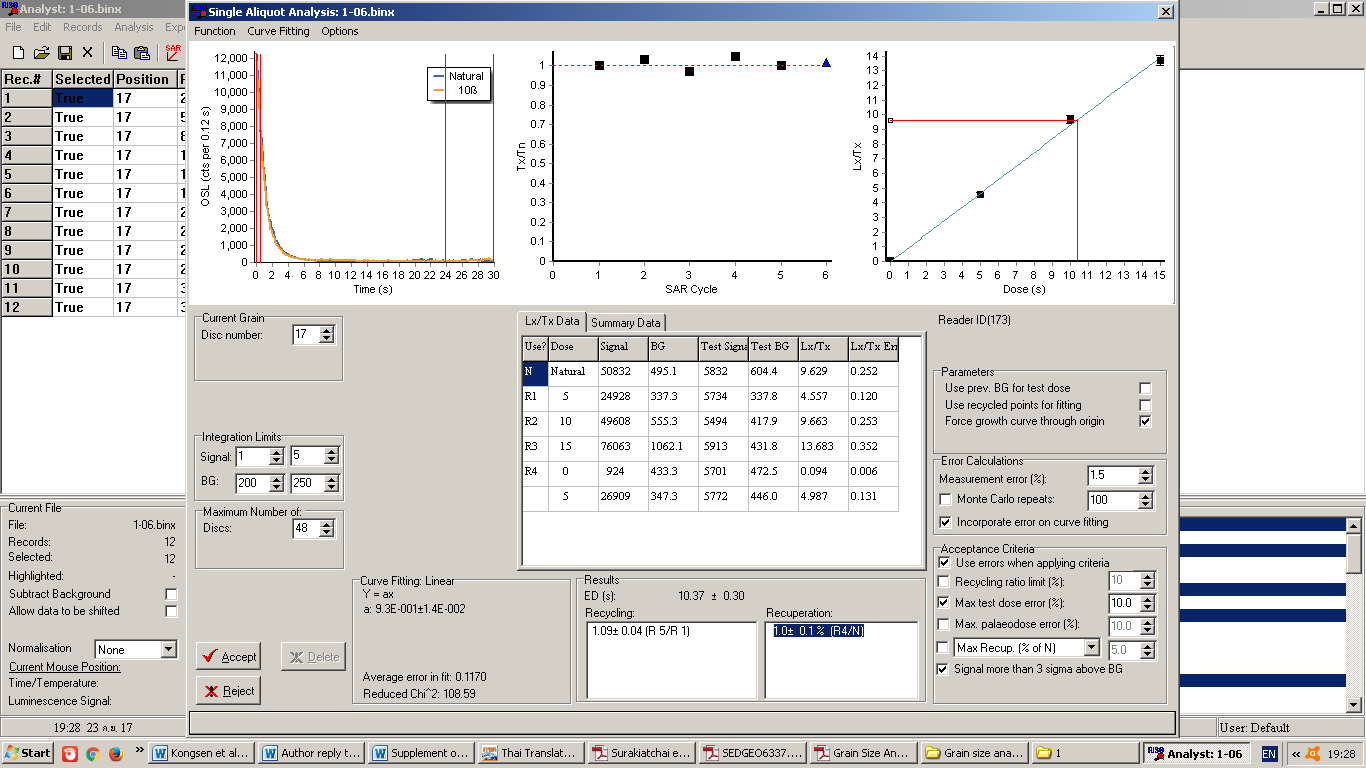


Recycling ratio = 1.09± 0.04 (R 5/R 1)

Recuperation = 1.0± 0.1 % (R4/N)

K7-7
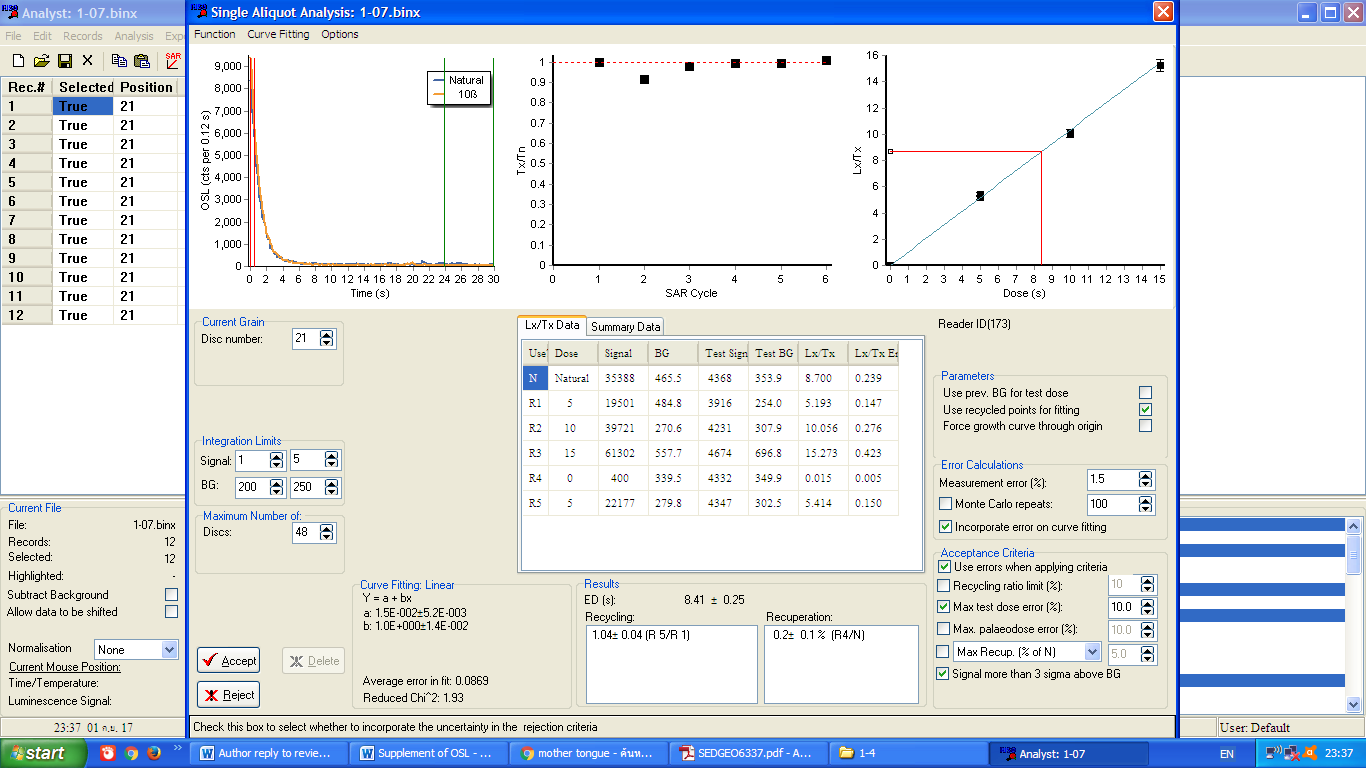
Recycling ratio = 1.04± 0.04 (R 5/R 1)

Recuperation = 0.2± 0.1 % (R4/N)

K8-1


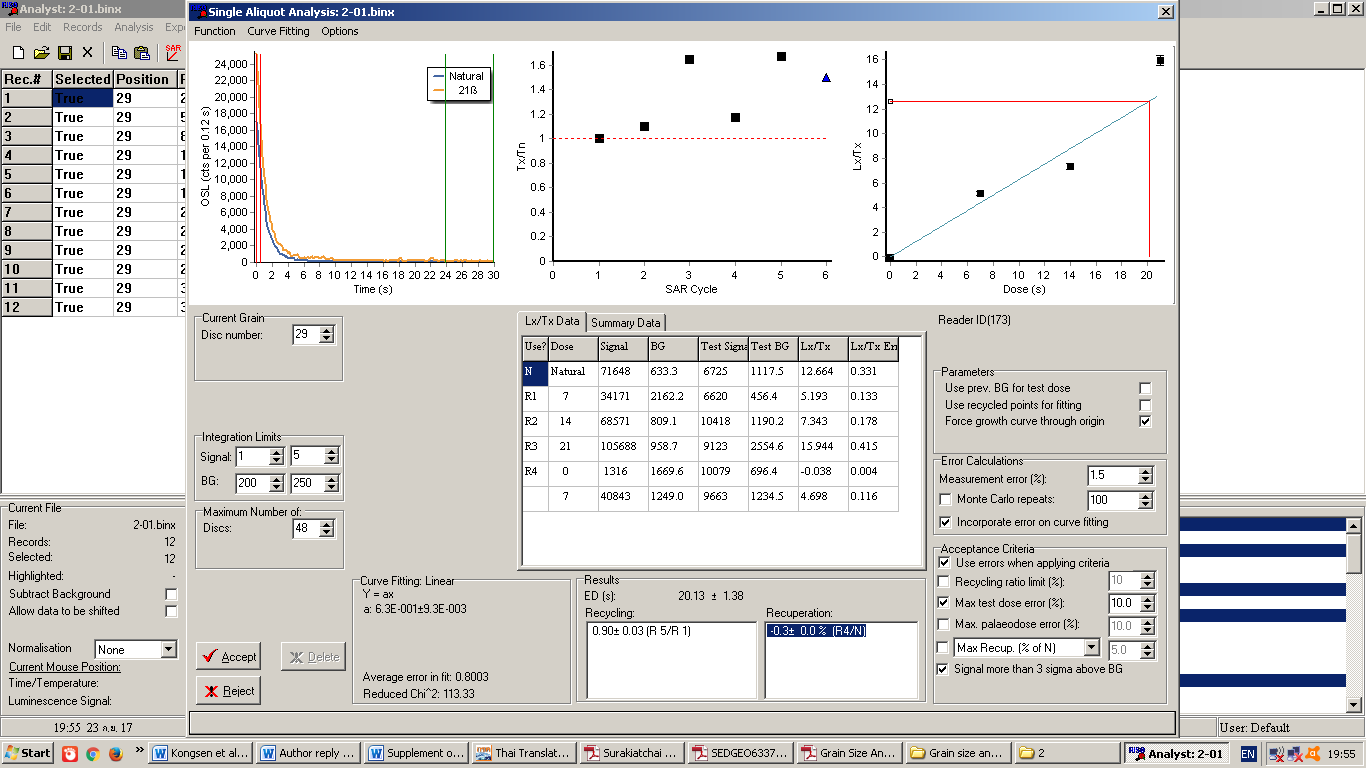


Recycling ratio = 0.90± 0.03 (R 5/R 1)

Recuperation = -0.3± 0.0 % (R4/N)

K8-2
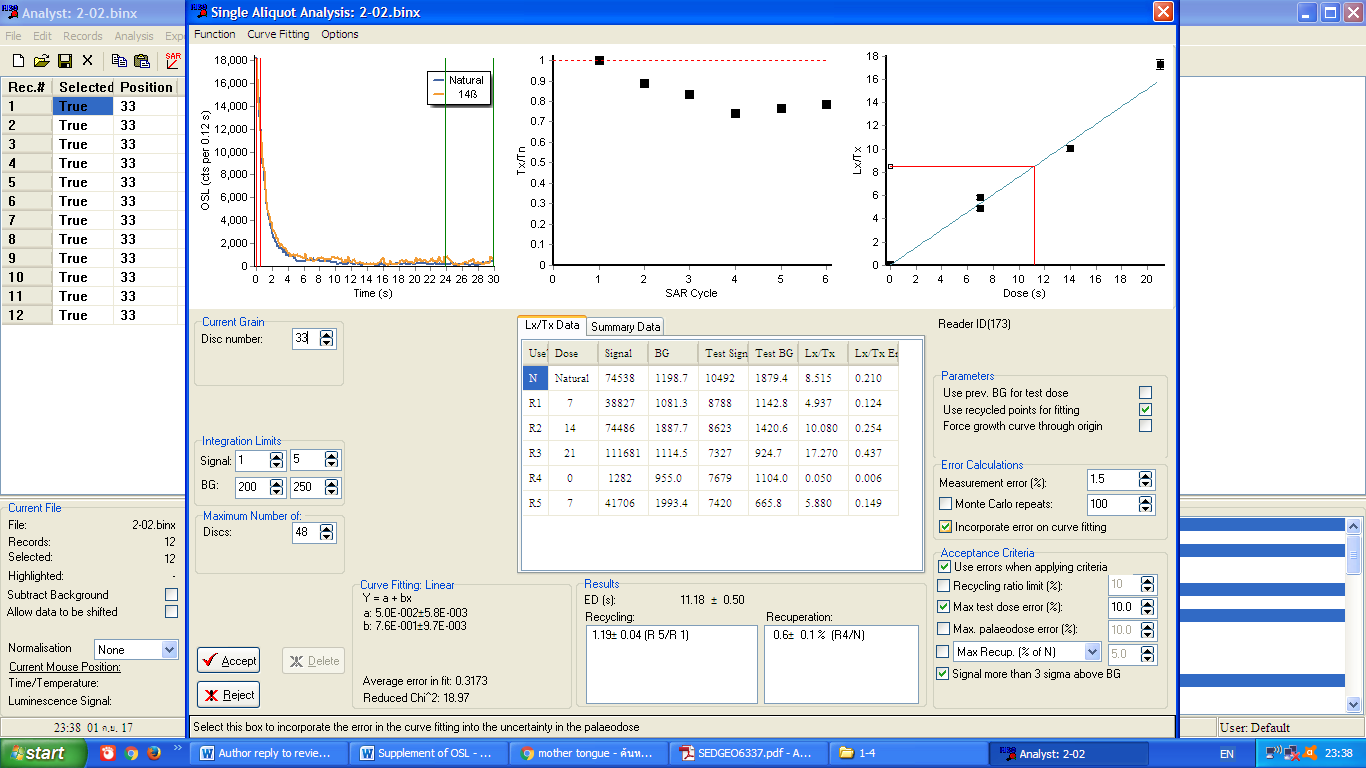
Recycling ratio = 1.19± 0.04 (R 5/R 1)

Recuperation = 0.6± 0.1 % (R4/N)

K8-3
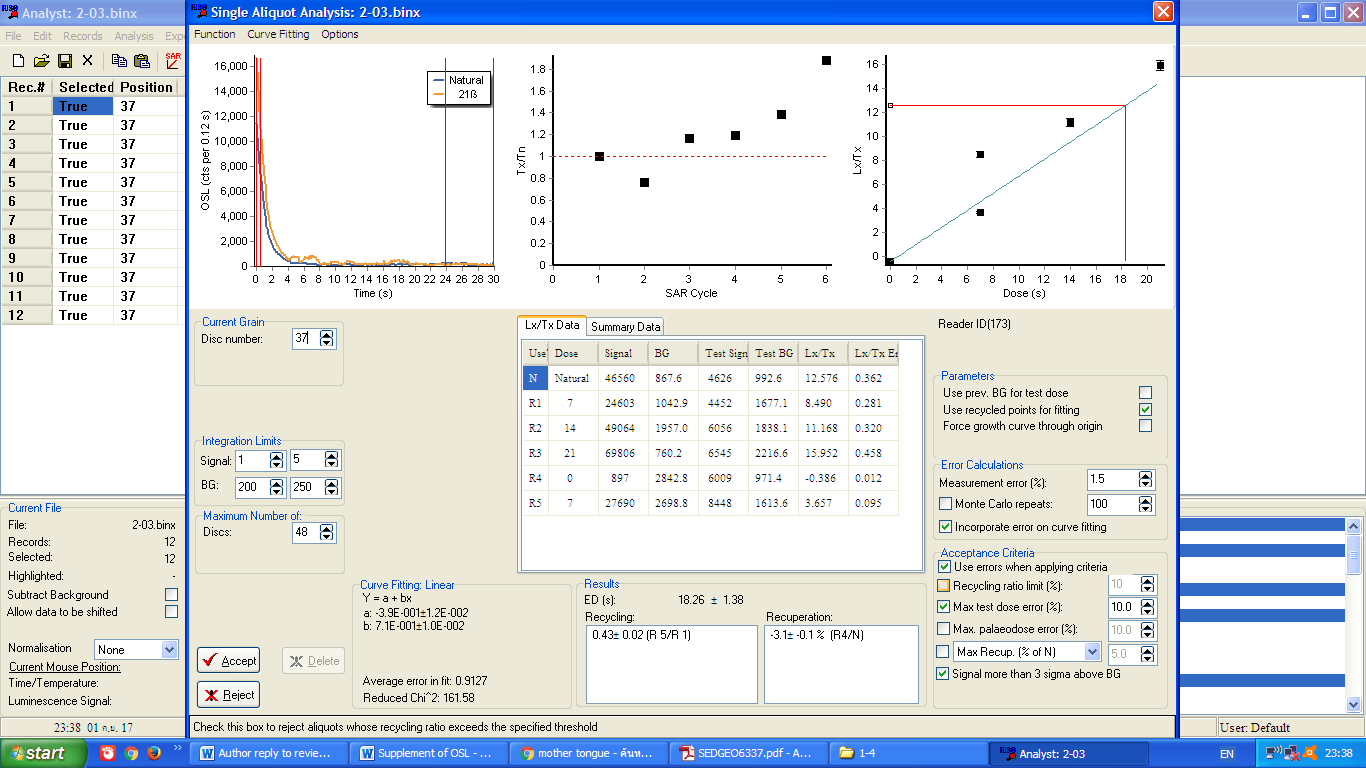
Recycling ratio = 0.43± 0.02 (R 5/R 1)

Recuperation = -3.1± -0.1 % (R4/N)

K8-4
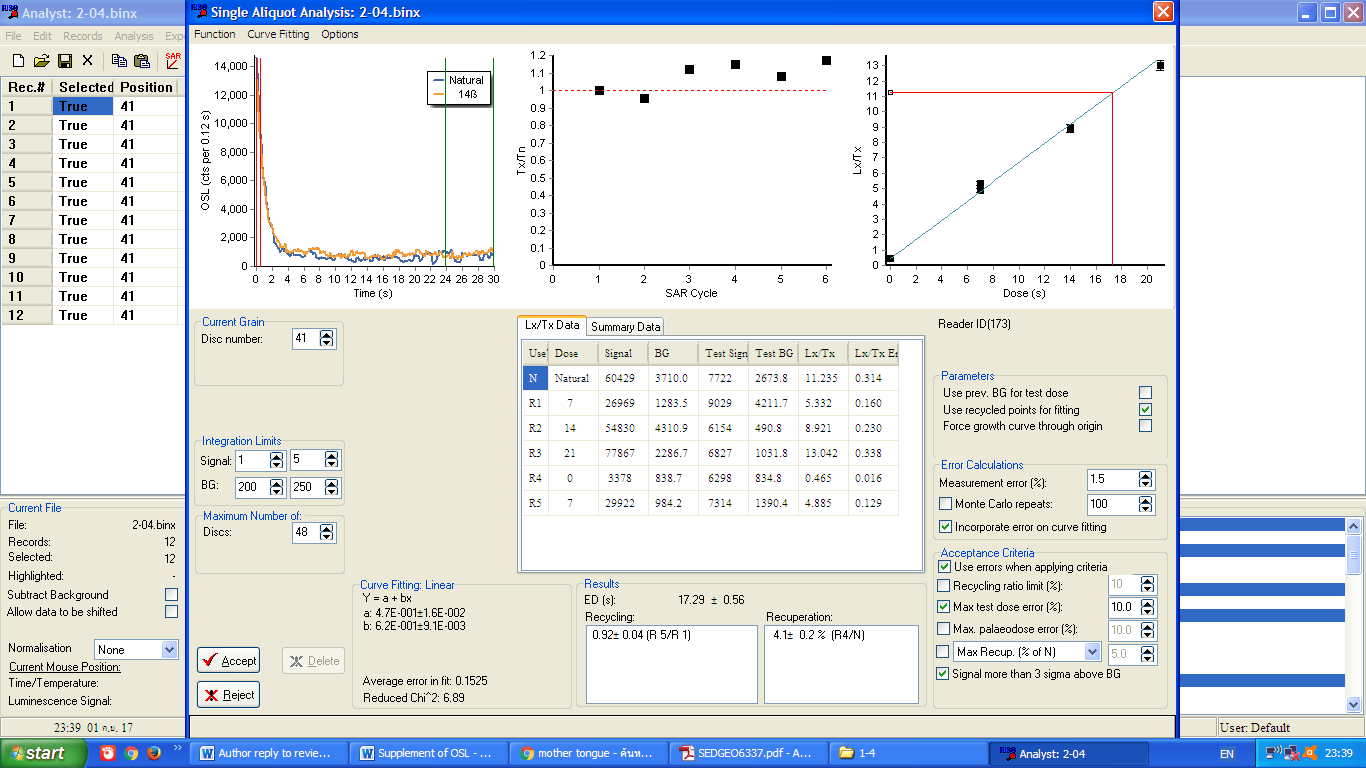
Recycling ratio = 0.92± 0.04 (R 5/R 1

Recuperation = 4.1± 0.2 % (R4/N)

K8-5
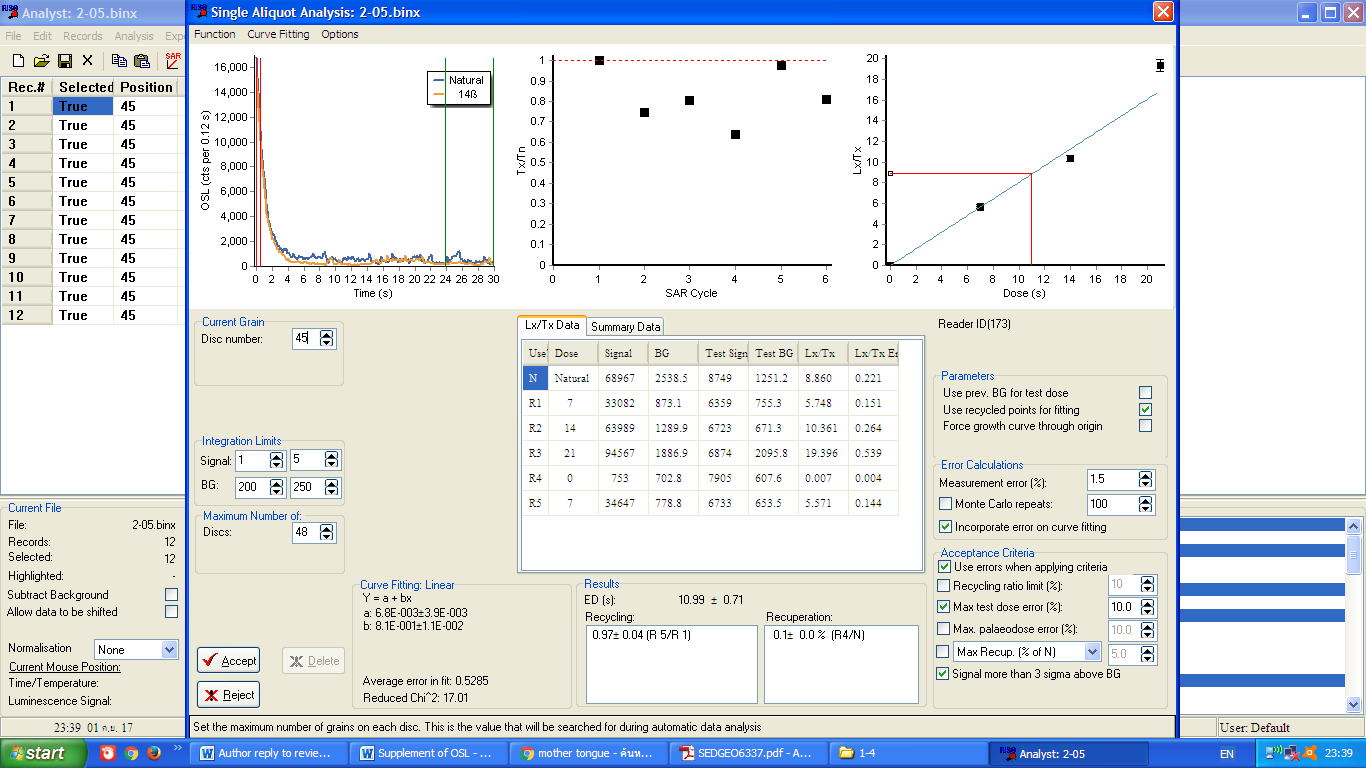
Recycling ratio = 0.97± 0.04 (R 5/R 1)

Recuperation = 0.1± 0.0 % (R4/N)

K9-1
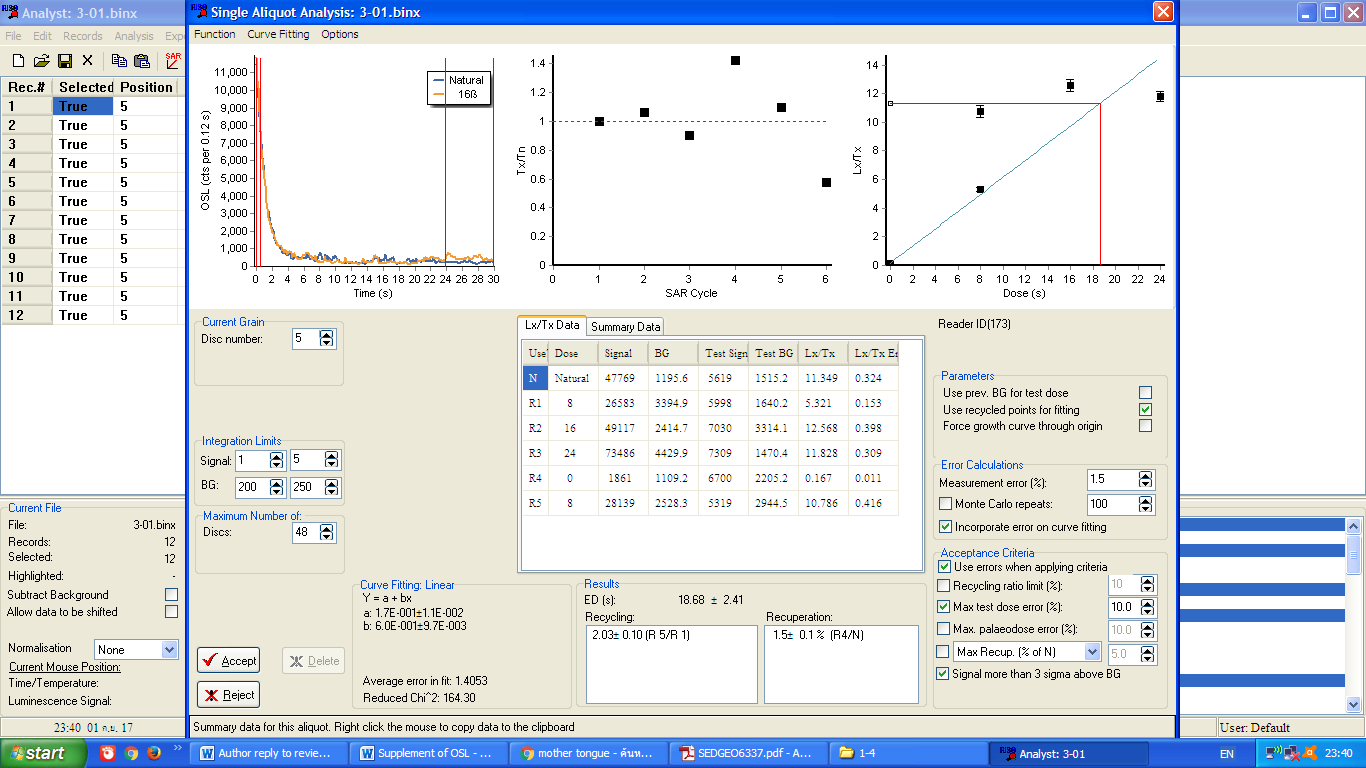
Recycling ratio = 2.03± 0.10 (R 5/R 1)

Recuperation = 1.5± 0.1 % (R4/N)

K9-2
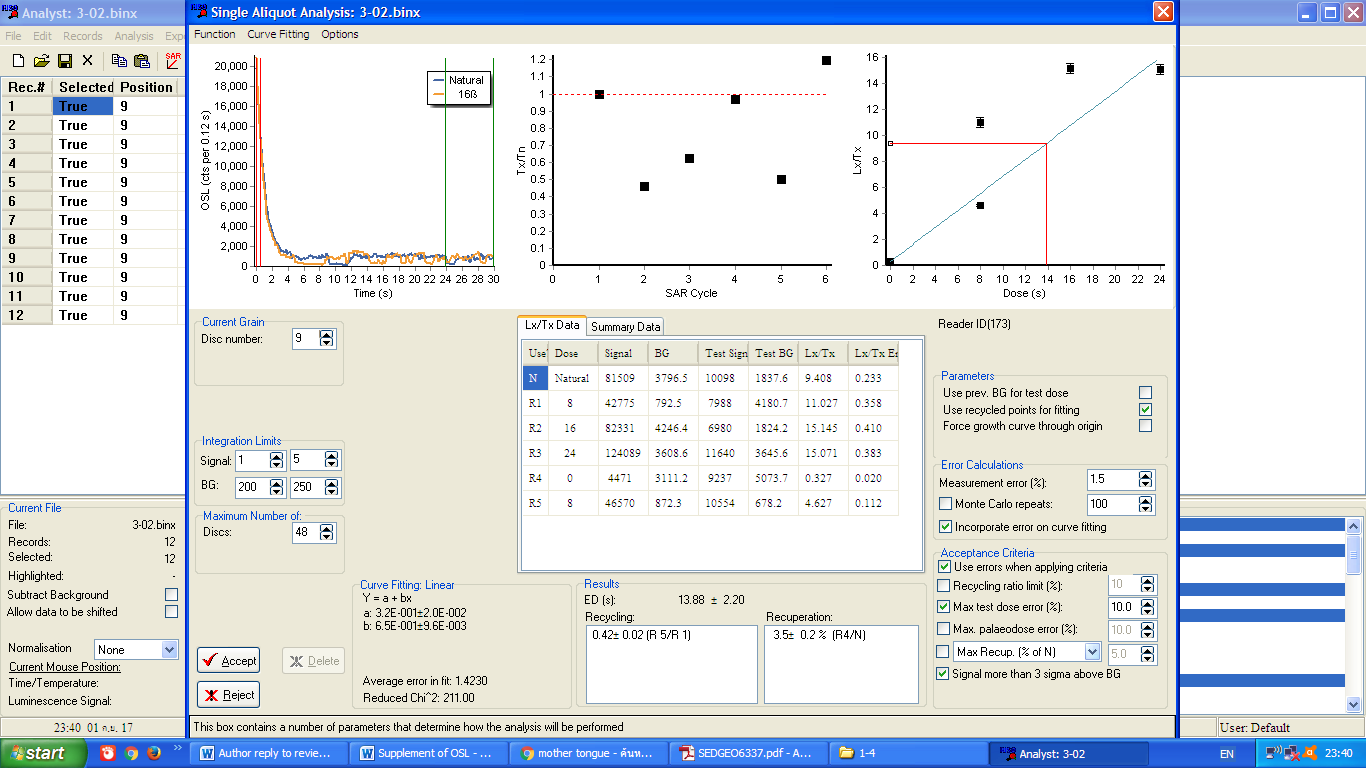
Recycling ratio = 0.42± 0.02 (R 5/R 1)

Recuperation = 3.5± 0.2 % (R4/N)

K9-3
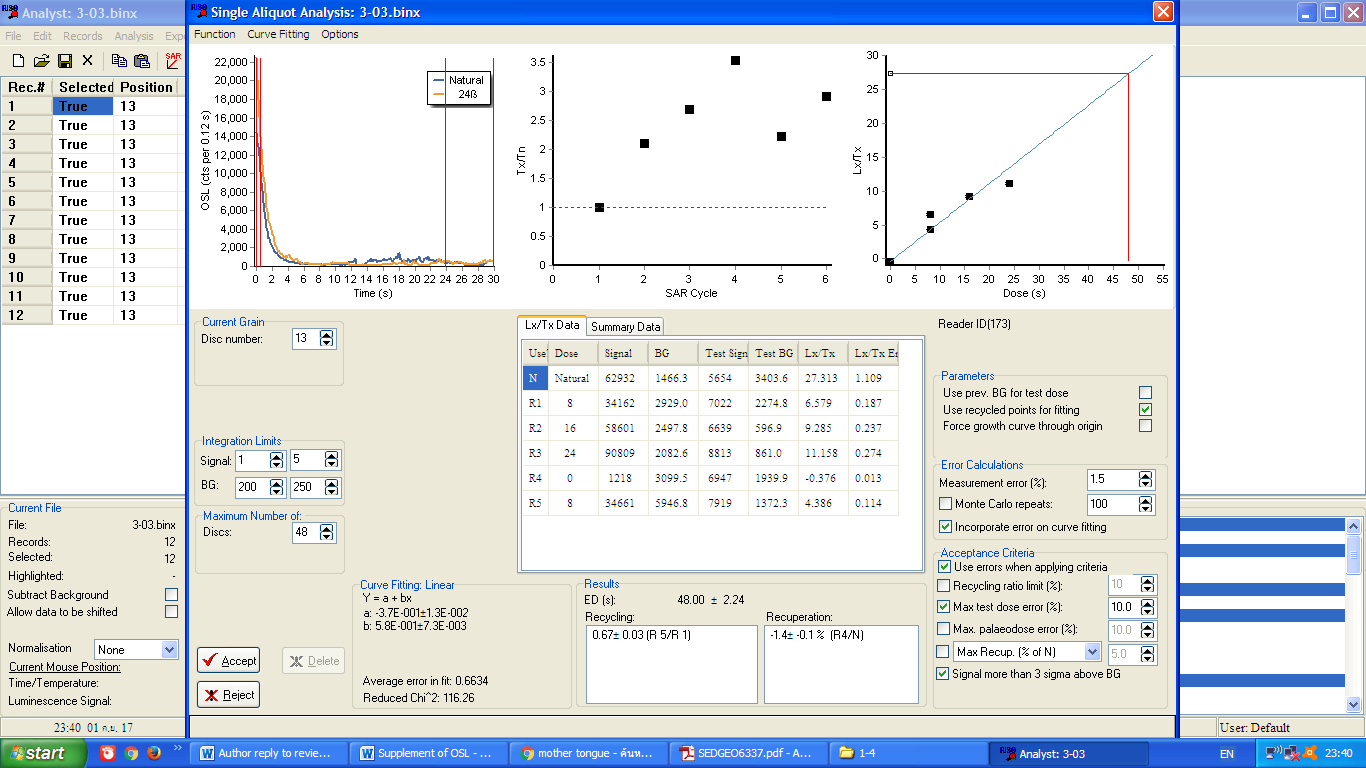
Recycling ratio = 0.67± 0.03 (R 5/R 1)

Recuperation = -1.4± -0.1 % (R4/N)

K9-4
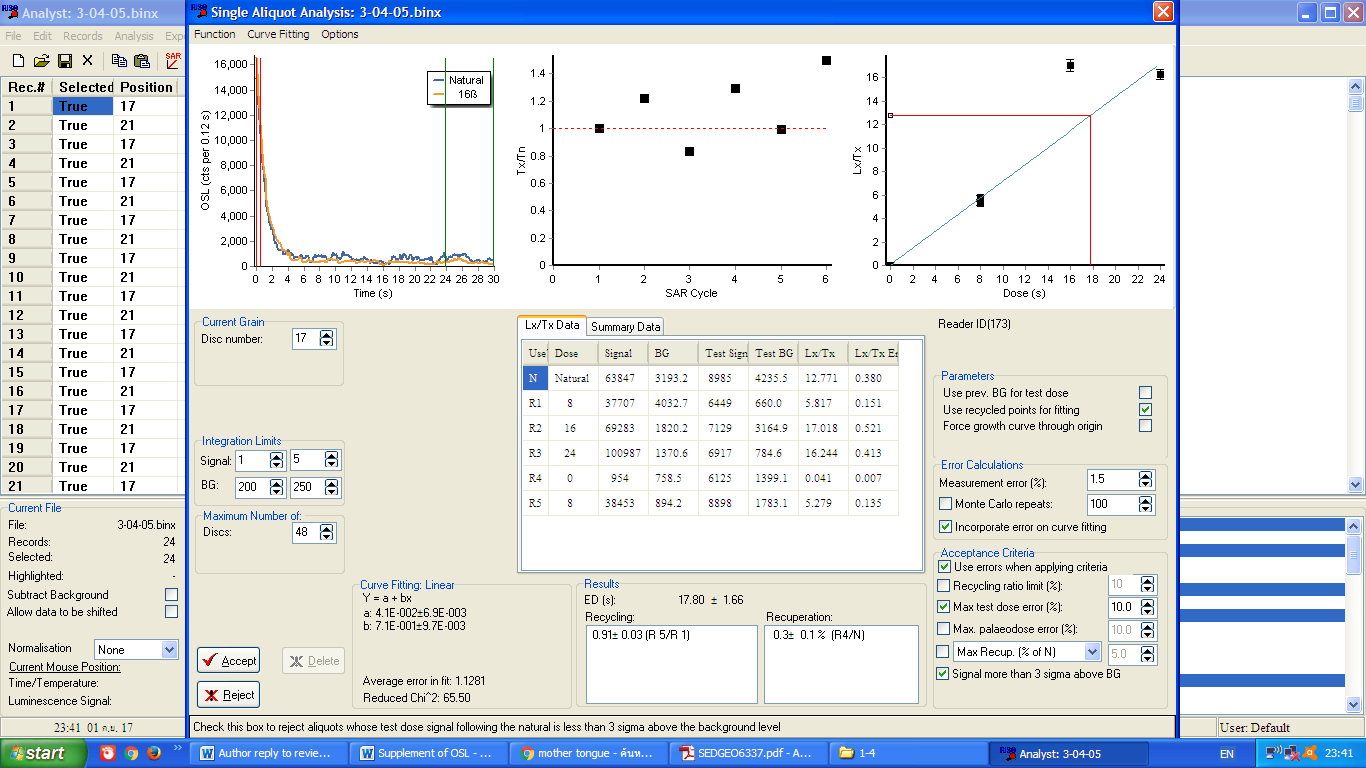
Recycling ratio = 0.91± 0.03 (R 5/R 1)

Recuperation = 0.3± 0.1 % (R4/N)

K9-5
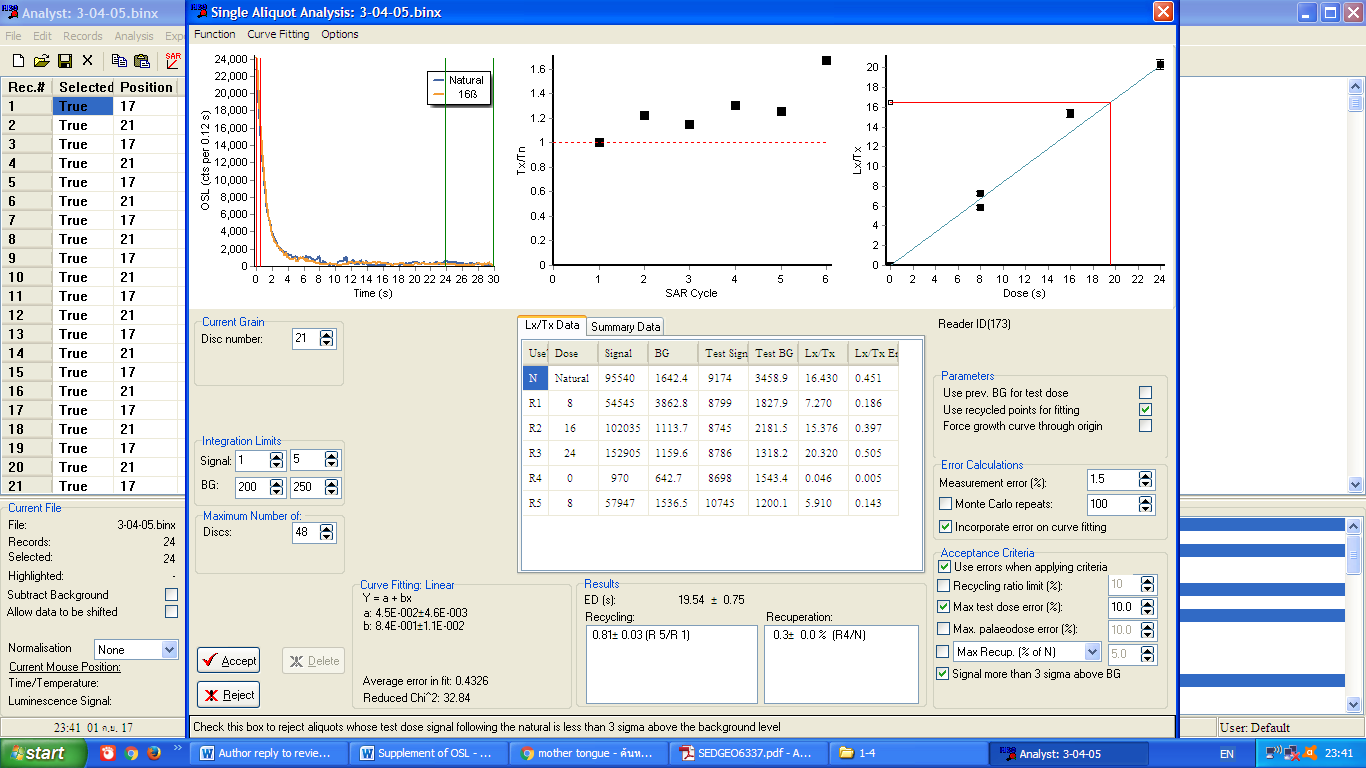
Recycling ratio = 0.81± 0.03 (R 5/R 1)

Recuperation = 0.3± 0.0 % (R4/N)

K10-1
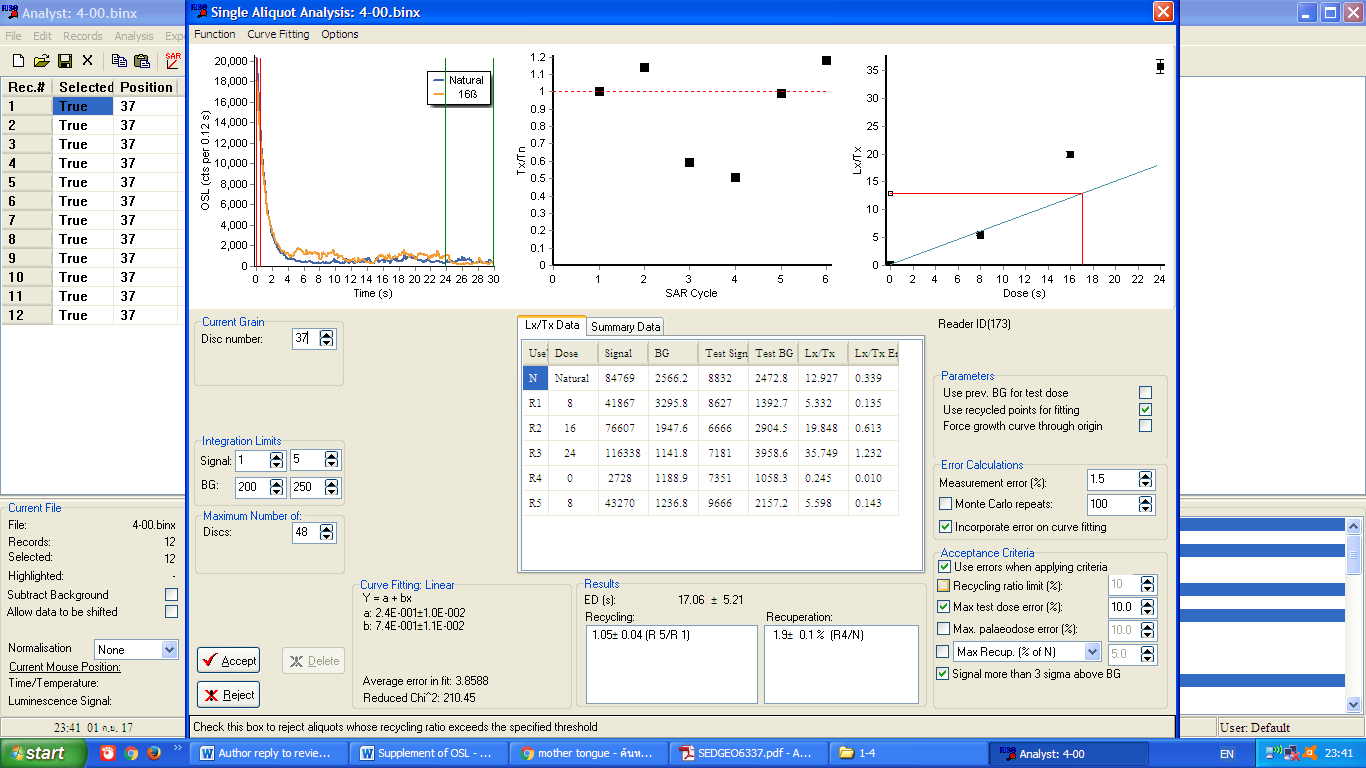
Recycling ratio = 1.05± 0.04 (R 5/R 1)

Recuperation = 1.9± 0.1 % (R4/N)

K10-2


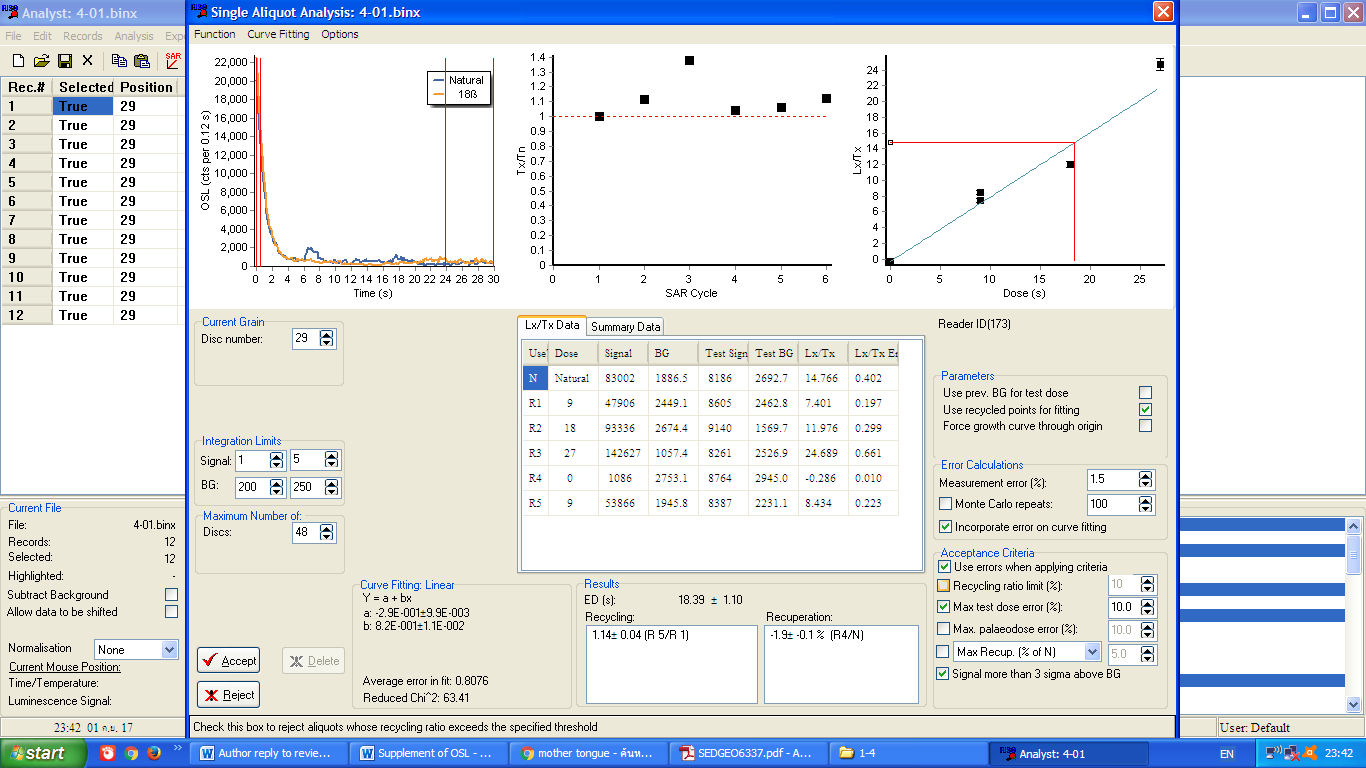
Recycling ratio = 1.14± 0.04 (R 5/R 1)

Recuperation = -1.9± -0.1 % (R4/N)

K10-3
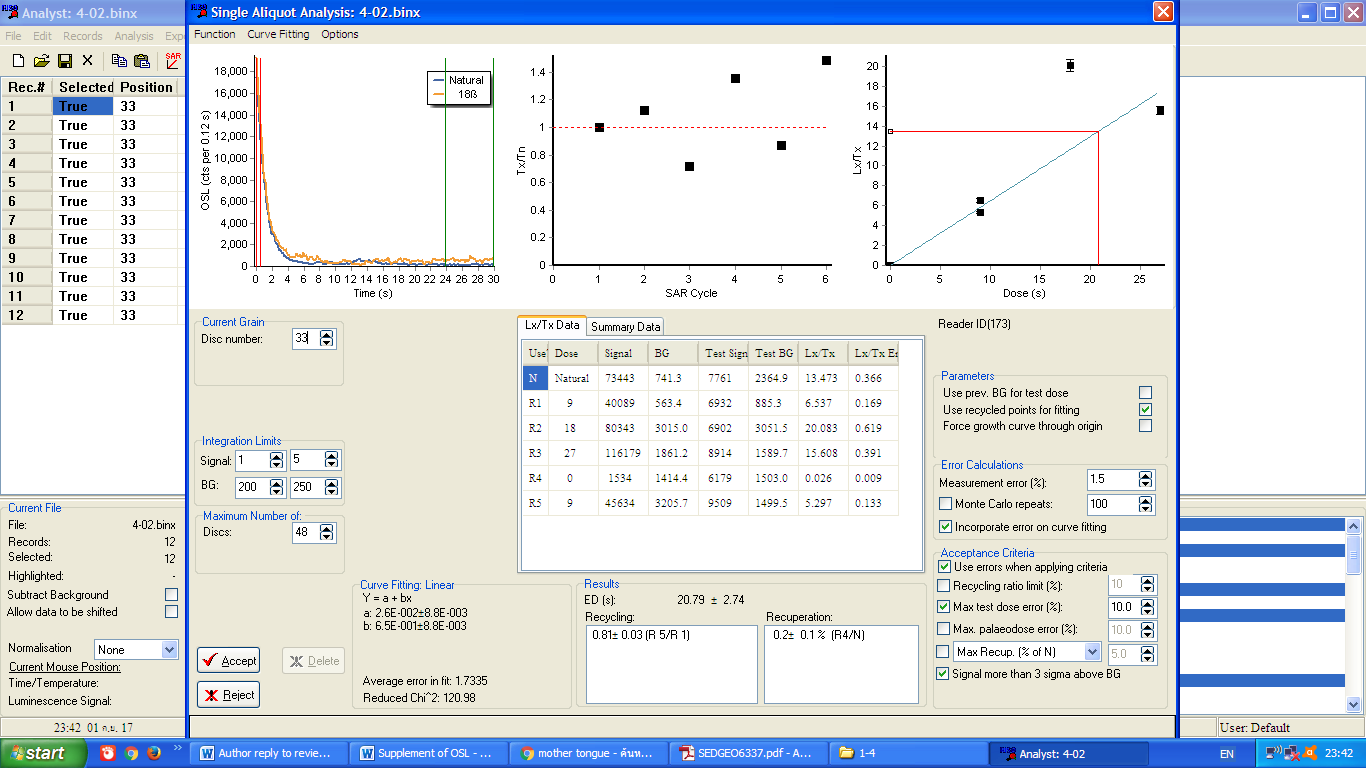
Recycling ratio = 0.81± 0.03 (R 5/R 1)

Recuperation = 0.2± 0.1 % (R4/N)

K10-4
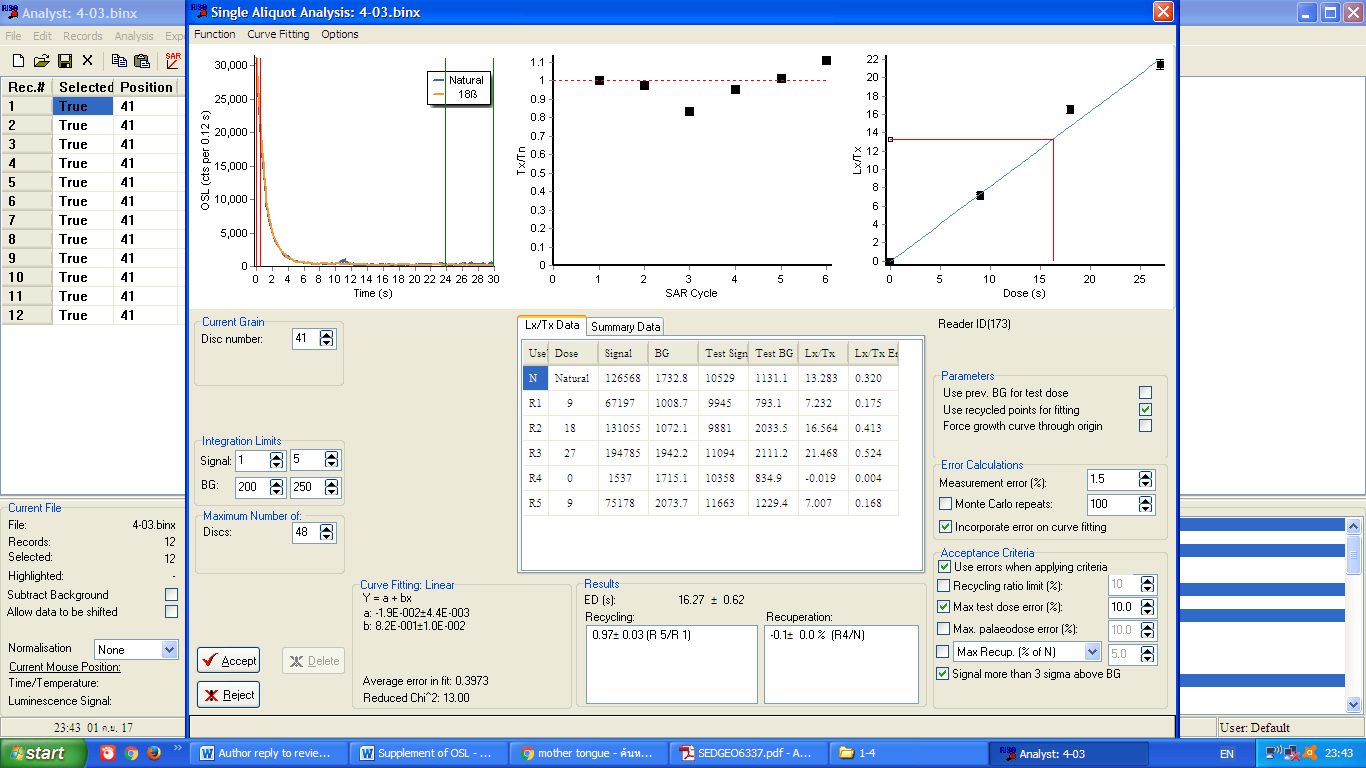
Recycling ratio = 0.97± 0.03 (R 5/R 1)

Recuperation = -0.1± 0.0 % (R4/N)

K10-5
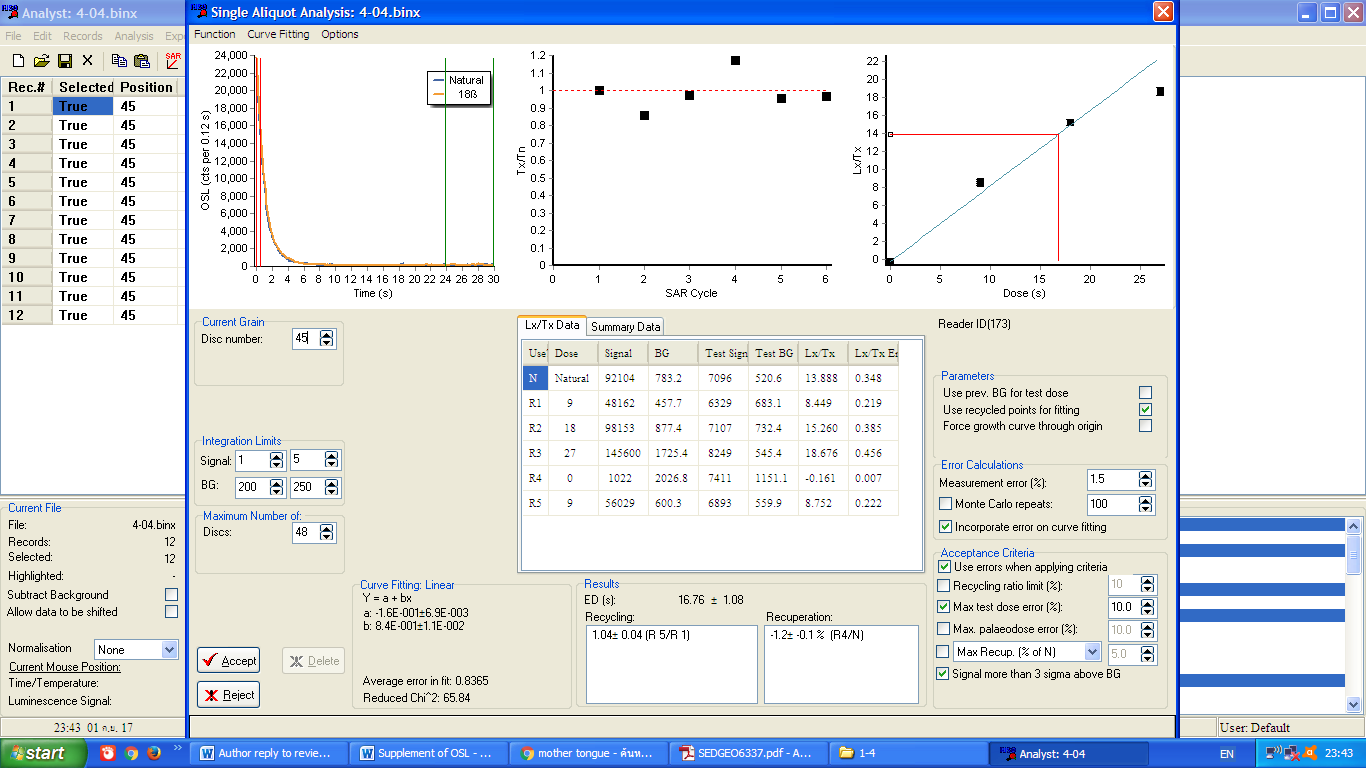
Recycling ratio = 1.04± 0.04 (R 5/R 1)

Recuperation = -1.2± -0.1 % (R4/N)
