# Supplementary material for: Distinguishing Late Holocene Storm Deposit From Shore-normal Beach Sediments From the Gulf of Thailand
Source: Frontiers journal article supplement (doi:10.3389/feart.2021.625926), 2021-02-22
Supplement: Table_3.DOCX [file Table_3.DOCX]

**Sediment composition, sphericity and roundness**

|  |  | **Composition %** | | | |  |  |
| --- | --- | --- | --- | --- | --- | --- | --- |
| **Sample no.** | **Sedimentary Unit** | **Quartz** | **Bioclast** | **Rock fragment** | **Heavy mineral** | **Sphericity** | **Roundness** |
| 1 | candidate storm sediment | 58 | 40 | 1 | 1 | low | Very angular - Sub-angular |
| 2 | candidate storm sediment | 67 | 30 | 0 | 3 | medium | Angular - Sub-rounded |
| 3 | candidate storm sediment | 54 | 40 | 3 | 3 | low | Very angular - Sub-angular |
| 4 | candidate storm sediment | 84 | 10 | 3 | 3 | medium | Angular - Sub-rounded |
| 5 | candidate storm sediment | 82 | 10 | 1 | 7 | low | Angular - Sub-rounded |
| 6 | candidate storm sediment | 67 | 25 | 1 | 7 | low | Angular - Sub-rounded |
| 7 | candidate storm sediment | 65 | 25 | 3 | 7 | low | Angular - Sub-rounded |
| 8 | candidate storm sediment | 56 | 40 | 1 | 3 | low | Very angular - Sub-angular |
| 9 | candidate storm sediment | 58 | 40 | 1 | 1 | low | Angular - Sub-rounded |
| 10 | candidate storm sediment | 58 | 40 | 1 | 1 | low | Very angular - Sub-angular |
| 11 | candidate storm sediment | 64 | 30 | 1 | 5 | medium | Angular - Sub-rounded |
| 12 | candidate storm sediment | 78 | 20 | 1 | 1 | medium | Angular - Sub-rounded |
| 13 | candidate storm sediment | 64 | 30 | 1 | 5 | low | Angular - Sub-rounded |
| 14 | candidate storm sediment | 48 | 50 | 1 | 1 | medium | Angular - Sub-rounded |
| 15 | candidate storm sediment | 66 | 30 | 1 | 3 | low | Very angular - Sub-angular |
| 16 | candidate storm sediment | 46 | 50 | 1 | 3 | low | Angular - Sub-rounded |
| 17 | candidate storm sediment | 39 | 60 | 1 | - | low | Angular - Sub-rounded |
| 18 | candidate storm sediment | 28 | 66 | 3 | 3 | low | Very angular - Sub-angular |
| 19 | candidate storm sediment | 58 | 40 | 1 | 1 | low | Very angular - Sub-angular |
| 20 | candidate storm sediment | 82 | 10 | 3 | 5 | low | Very angular - Sub-angular |
| 21 | candidate storm sediment | 79 | 15 | 1 | 5 | low | Angular - Sub-rounded |
| 22 | candidate storm sediment | 65 | 25 | 3 | 7 | low | Very angular - Sub-angular |
| 23 | candidate storm sediment | 67 | 25 | 1 | 7 | low | Very angular - Sub-angular |
| 24 | candidate storm sediment | 46 | 50 | 3 | 1 | low | Very angular - Sub-angular |
| 25 | candidate storm sediment | 62 | 30 | 3 | 5 | low | Very angular - Sub-angular |
| 26 | candidate storm sediment | 52 | 40 | 1 | 7 | low | Very angular - Sub-angular |
| 27 | candidate storm sediment | 50 | 40 | 3 | 7 | low | Very angular - Sub-angular |
| 28 | candidate storm sediment | 71 | 25 | 1 | 3 | low | Very angular - Sub-angular |
| 29 | candidate storm sediment | 62 | 30 | 1 | 7 | low | Very angular - Sub-angular |
| 30 | candidate storm sediment | 64 | 30 | 1 | 5 | medium | Angular - Sub-rounded |
| 31 | candidate storm sediment | 65 | 25 | 3 | 7 | low | Very angular - Sub-angular |
| 32 | candidate storm sediment | 72 | 20 | 3 | 5 | medium | Angular - Sub-rounded |
| 33 | candidate storm sediment | 66 | 30 | 1 | 3 | low | Very angular - Sub-angular |
| 34 | candidate storm sediment | 56 | 40 | 1 | 3 | low | Very angular - Sub-angular |
| 35 | candidate storm sediment | 67 | 25 | 1 | 7 | medium | Angular - Sub-rounded |
| 36 | candidate storm sediment | 64 | 25 | 1 | 10 | medium | Angular - Sub-rounded |
| 37 | candidate storm sediment | 56 | 40 | 3 | 1 | low | Very angular - Sub-angular |
| 38 | candidate storm sediment | 56 | 40 | 3 | 1 | low | Very angular - Sub-angular |
| 39 | candidate storm sediment | 46 | 50 | 3 | 1 | low | Very angular - Sub-angular |
| 40 | candidate storm sediment | 89 | 1 | 5 | 5 | medium | Angular - Sub-rounded |
| 41 | candidate storm sediment | 89 | 3 | 5 | 3 | medium | Angular - Sub-rounded |
| 42 | candidate storm sediment | 88 | 5 | 7 | 0 | medium | Very angular - Sub-angular |
| 43 | candidate storm sediment | 88 | 5 | 7 | 0 | medium | Very angular - Sub-angular |
| 44 | beach ridge sediment | 97 | 0 | 2 | 1 | medium | Sub-angular - Rounded |
| 45 | beach ridge sediment | 97 | 0 | 2 | 1 | low | Very angular - sub-angular |
| 46 | beach ridge sediment | 98 | 0 | 2 | 0 | medium | Sub-angular - Rounded |
| 47 | recent beach | 69 | 25 | 1 | 5 | medium | Sub-angular - Rounded |
| 48 | recent beach | 80 | 16 | 1 | 3 | high | Sub-rounded - Rounded |
